# Supplementary material
Source: publisher figshare collection journal article supplement (https://karger.figshare.com/articles/dataset/_/21617931)
Supplement: Supplementary file 2 [file 1]

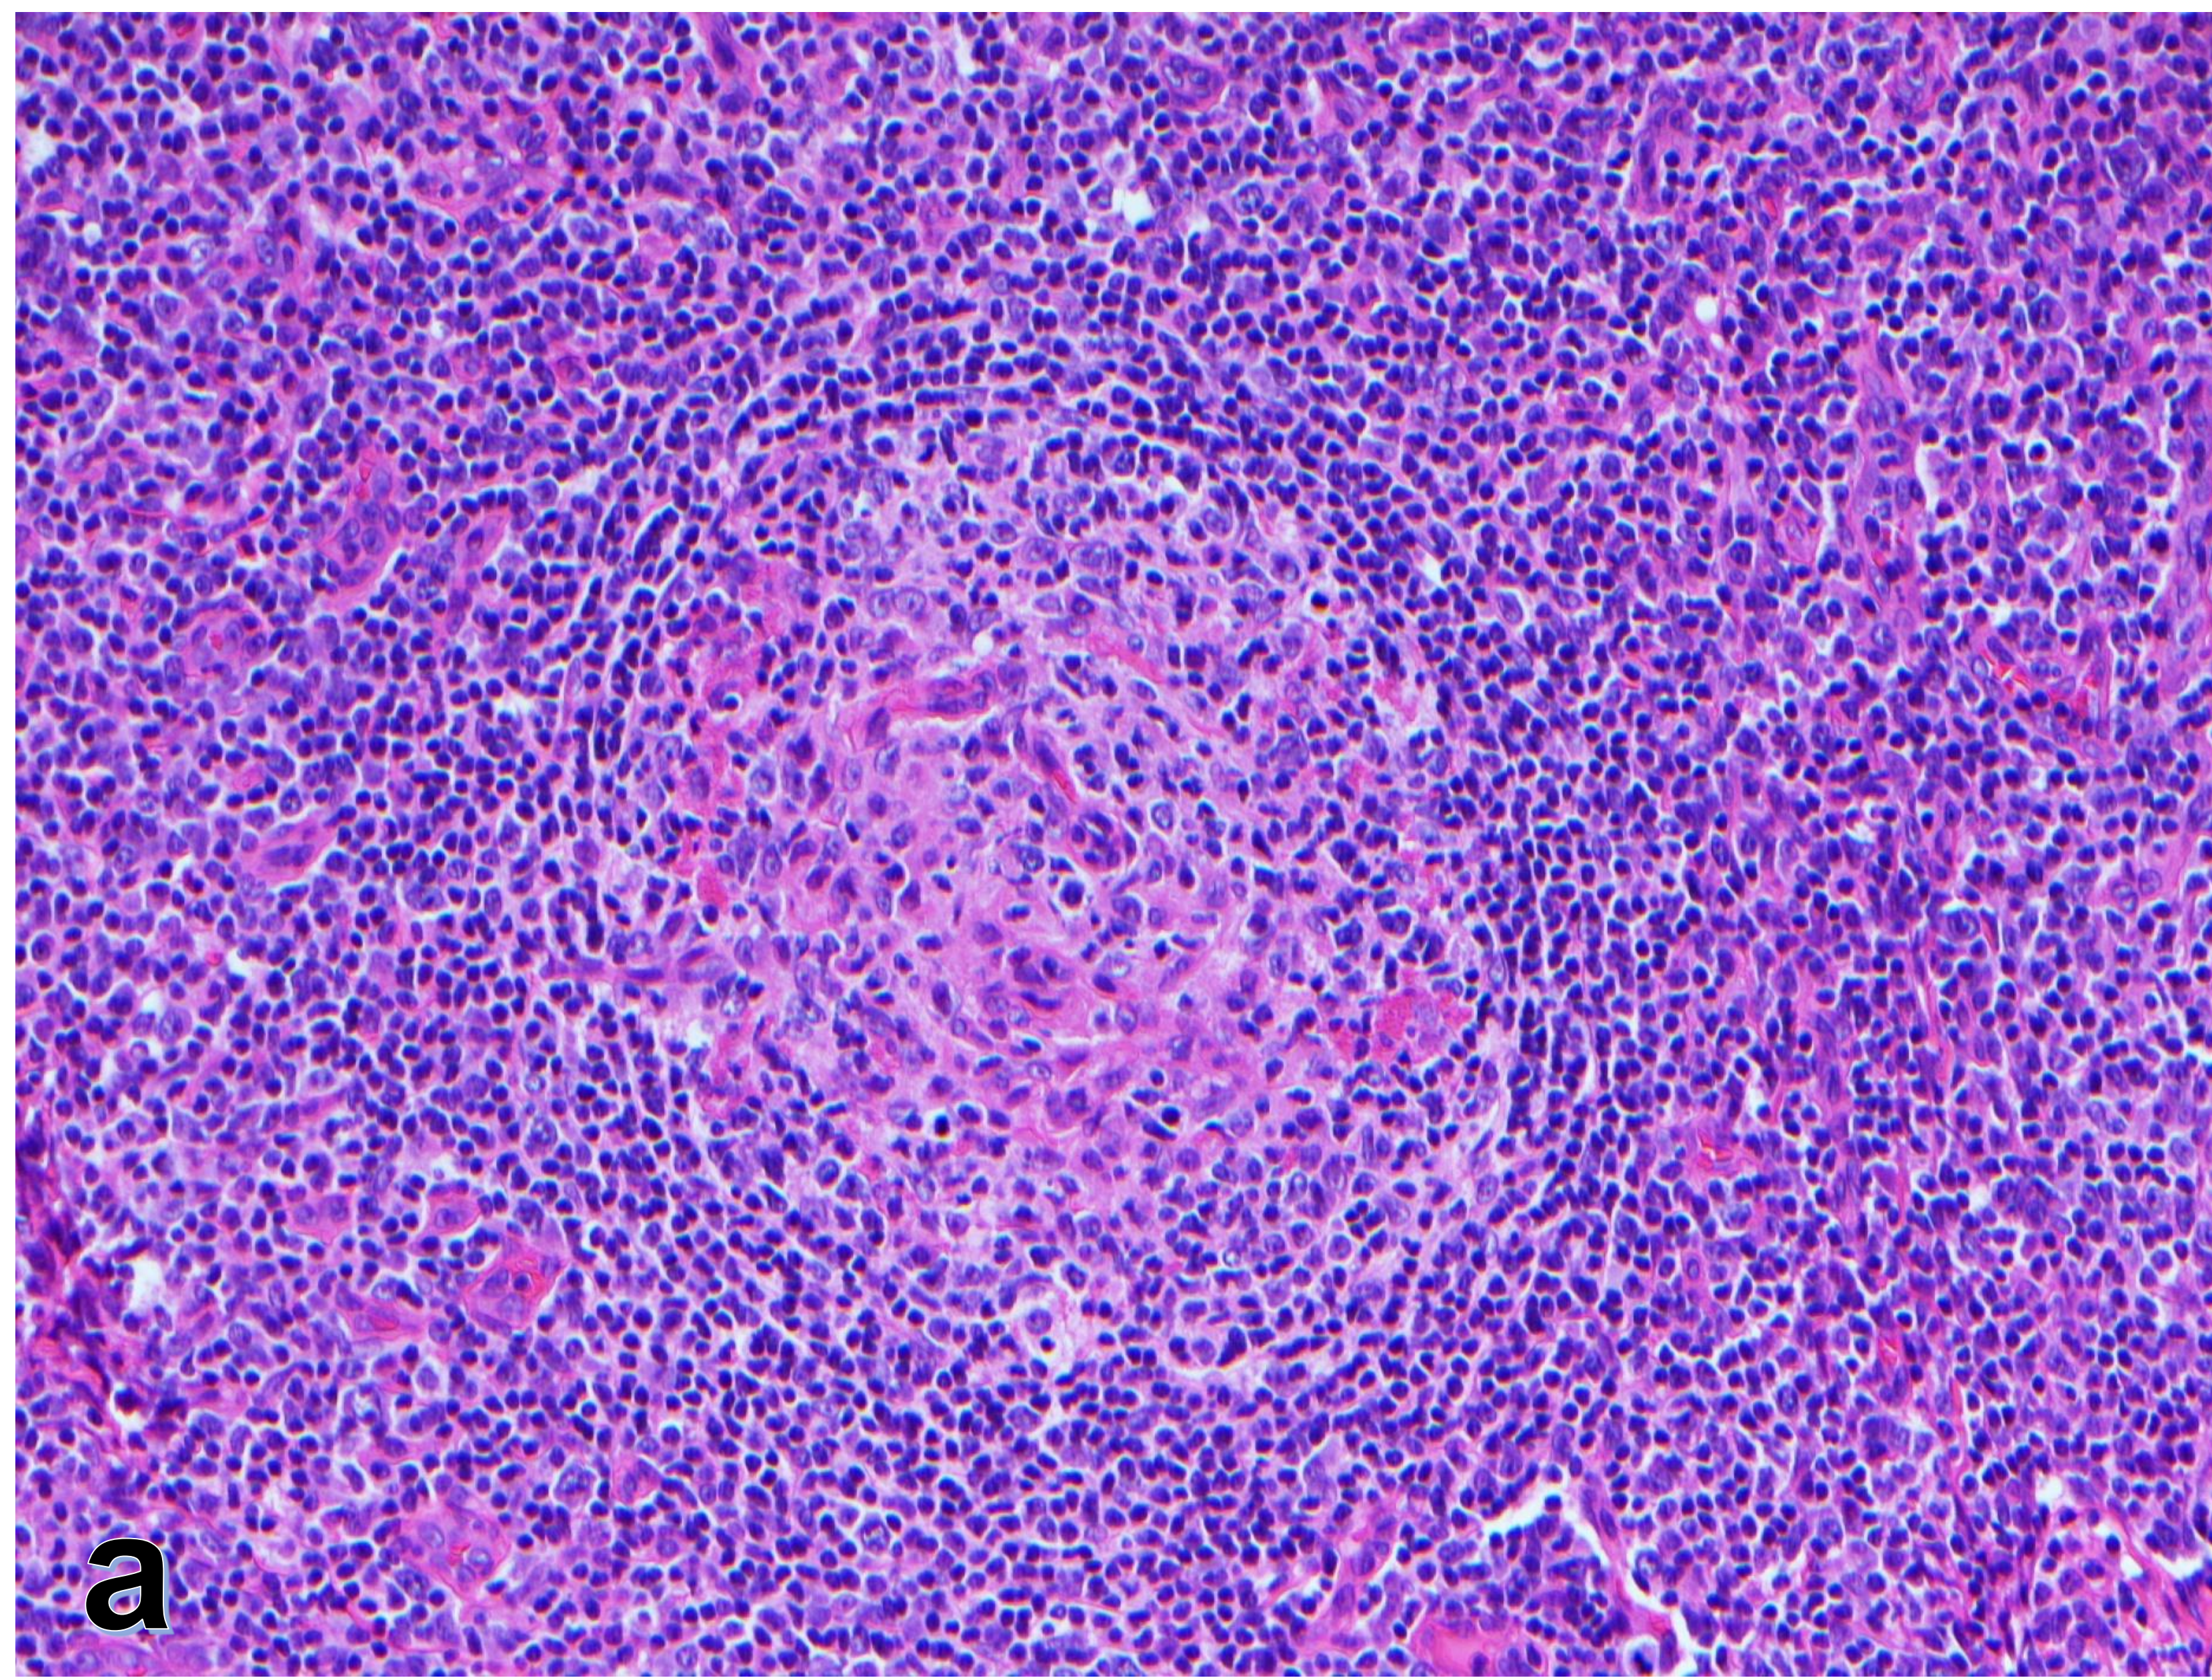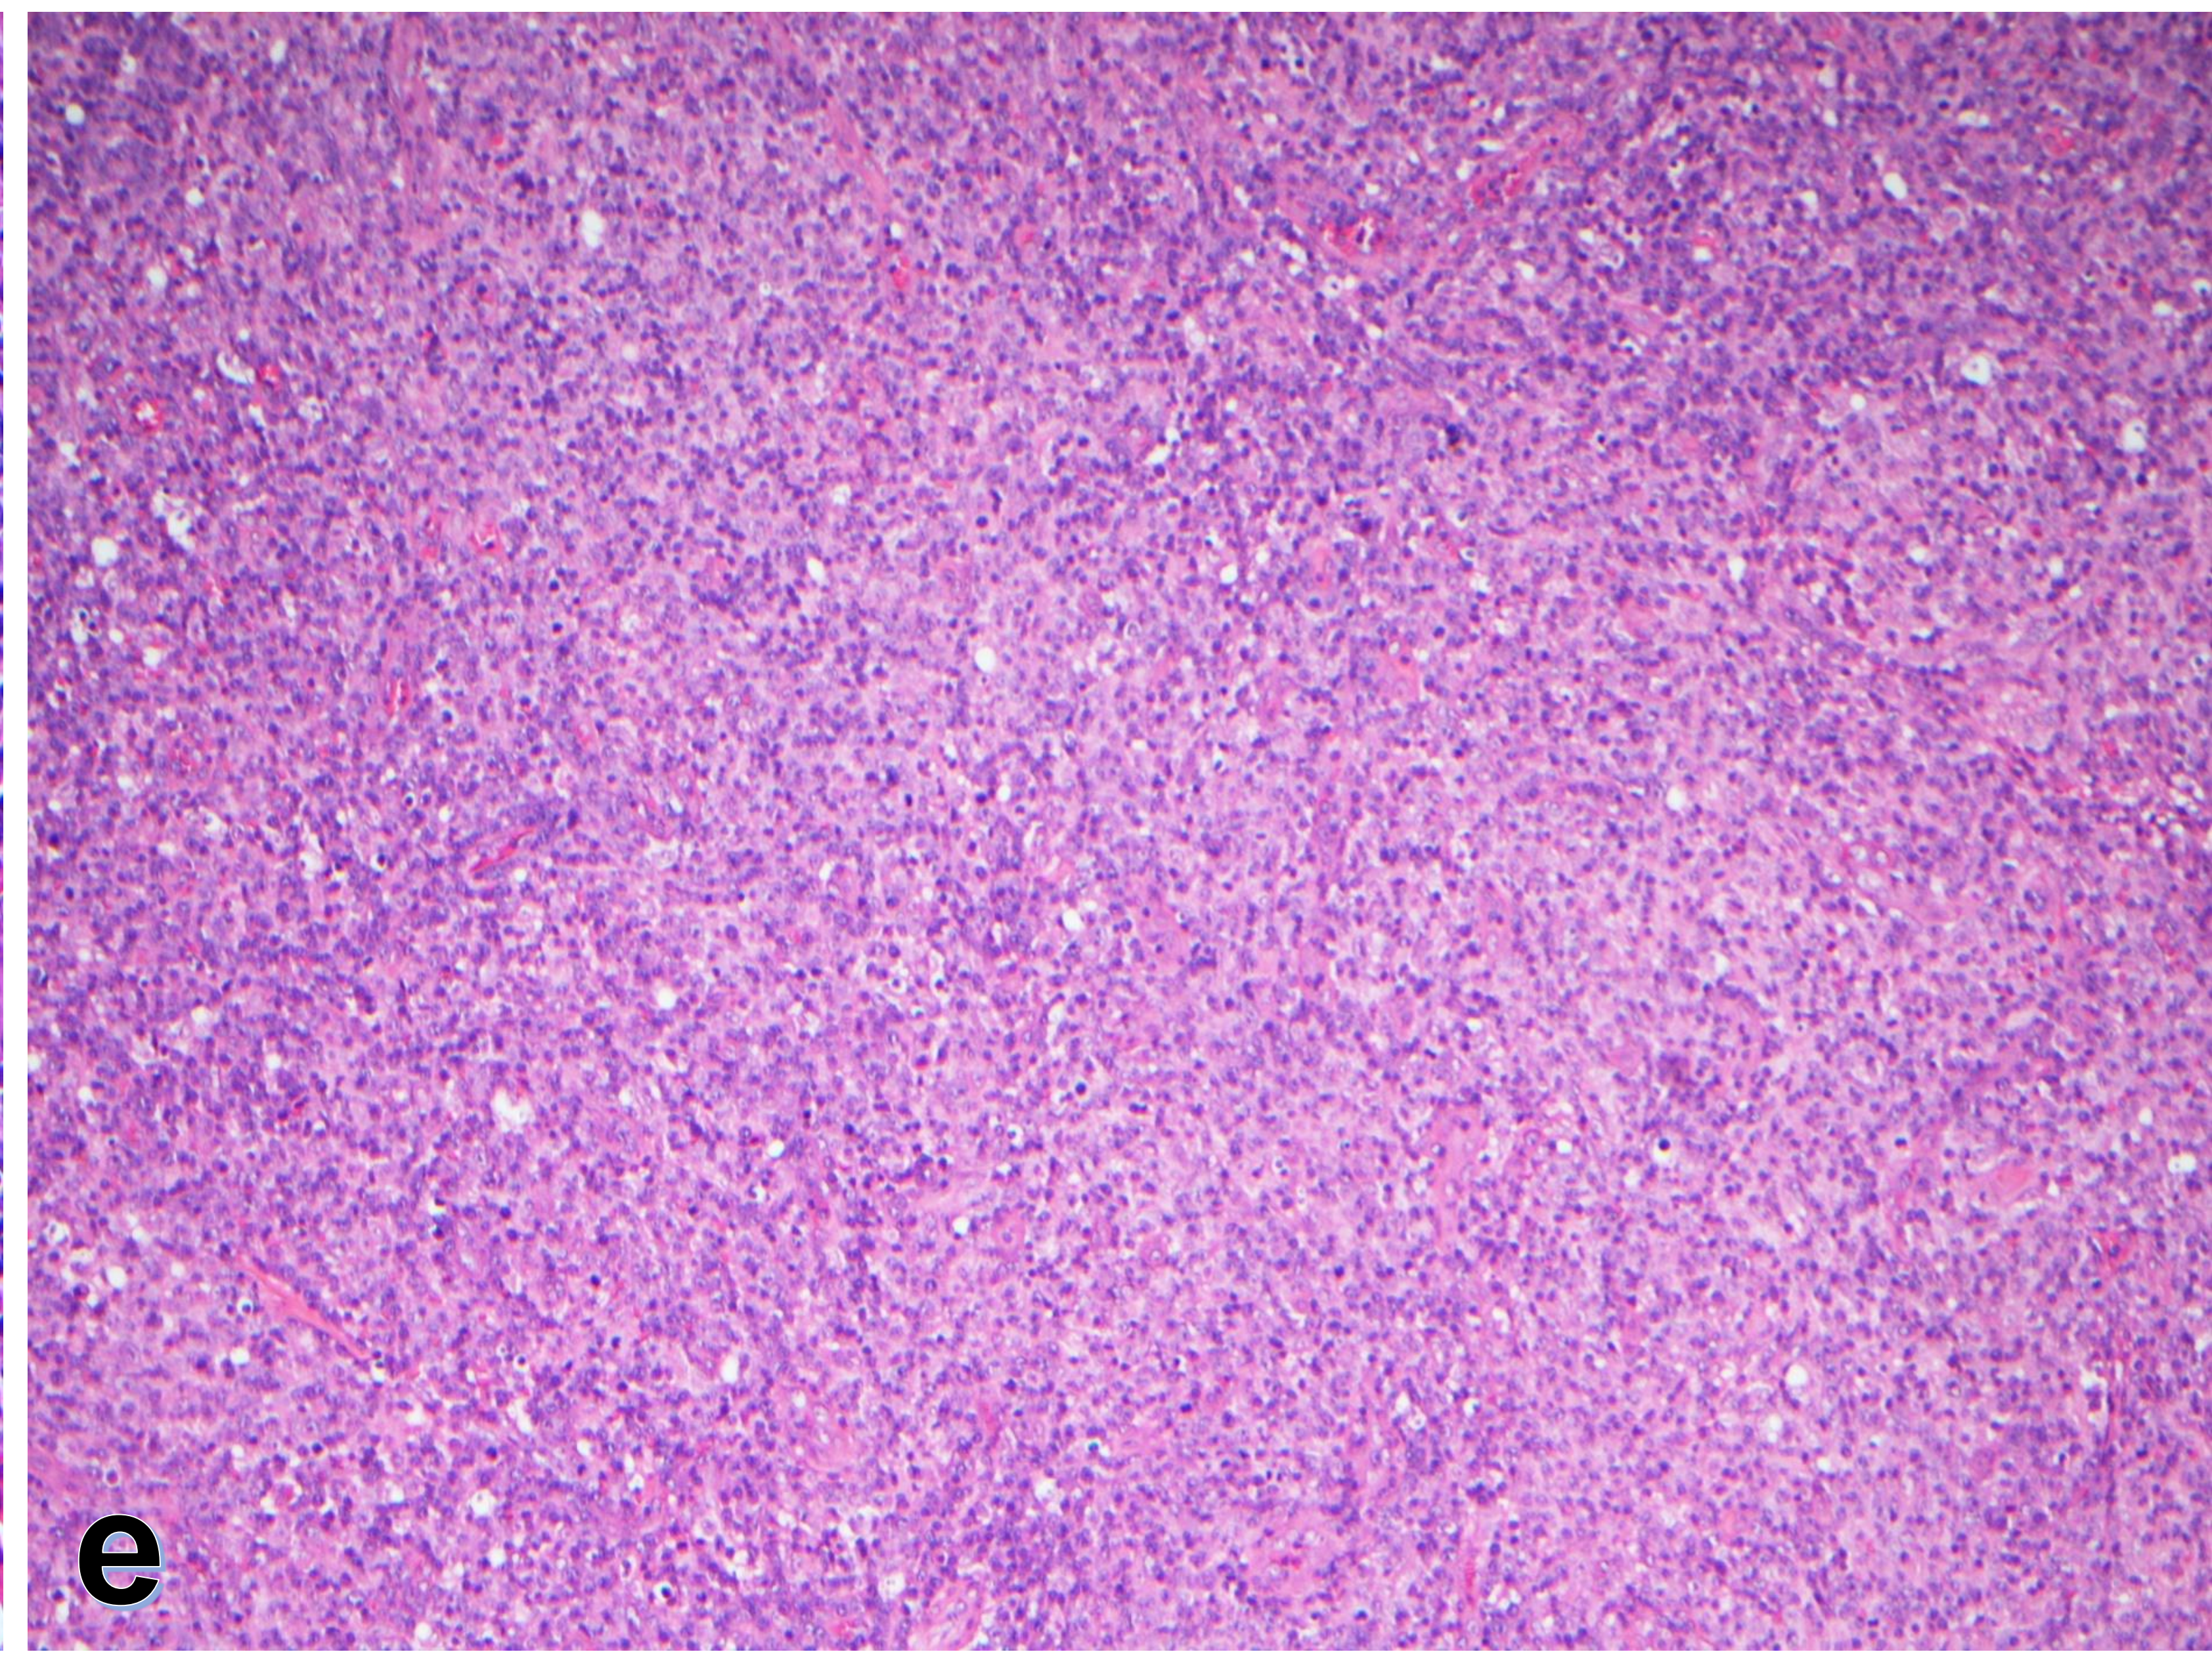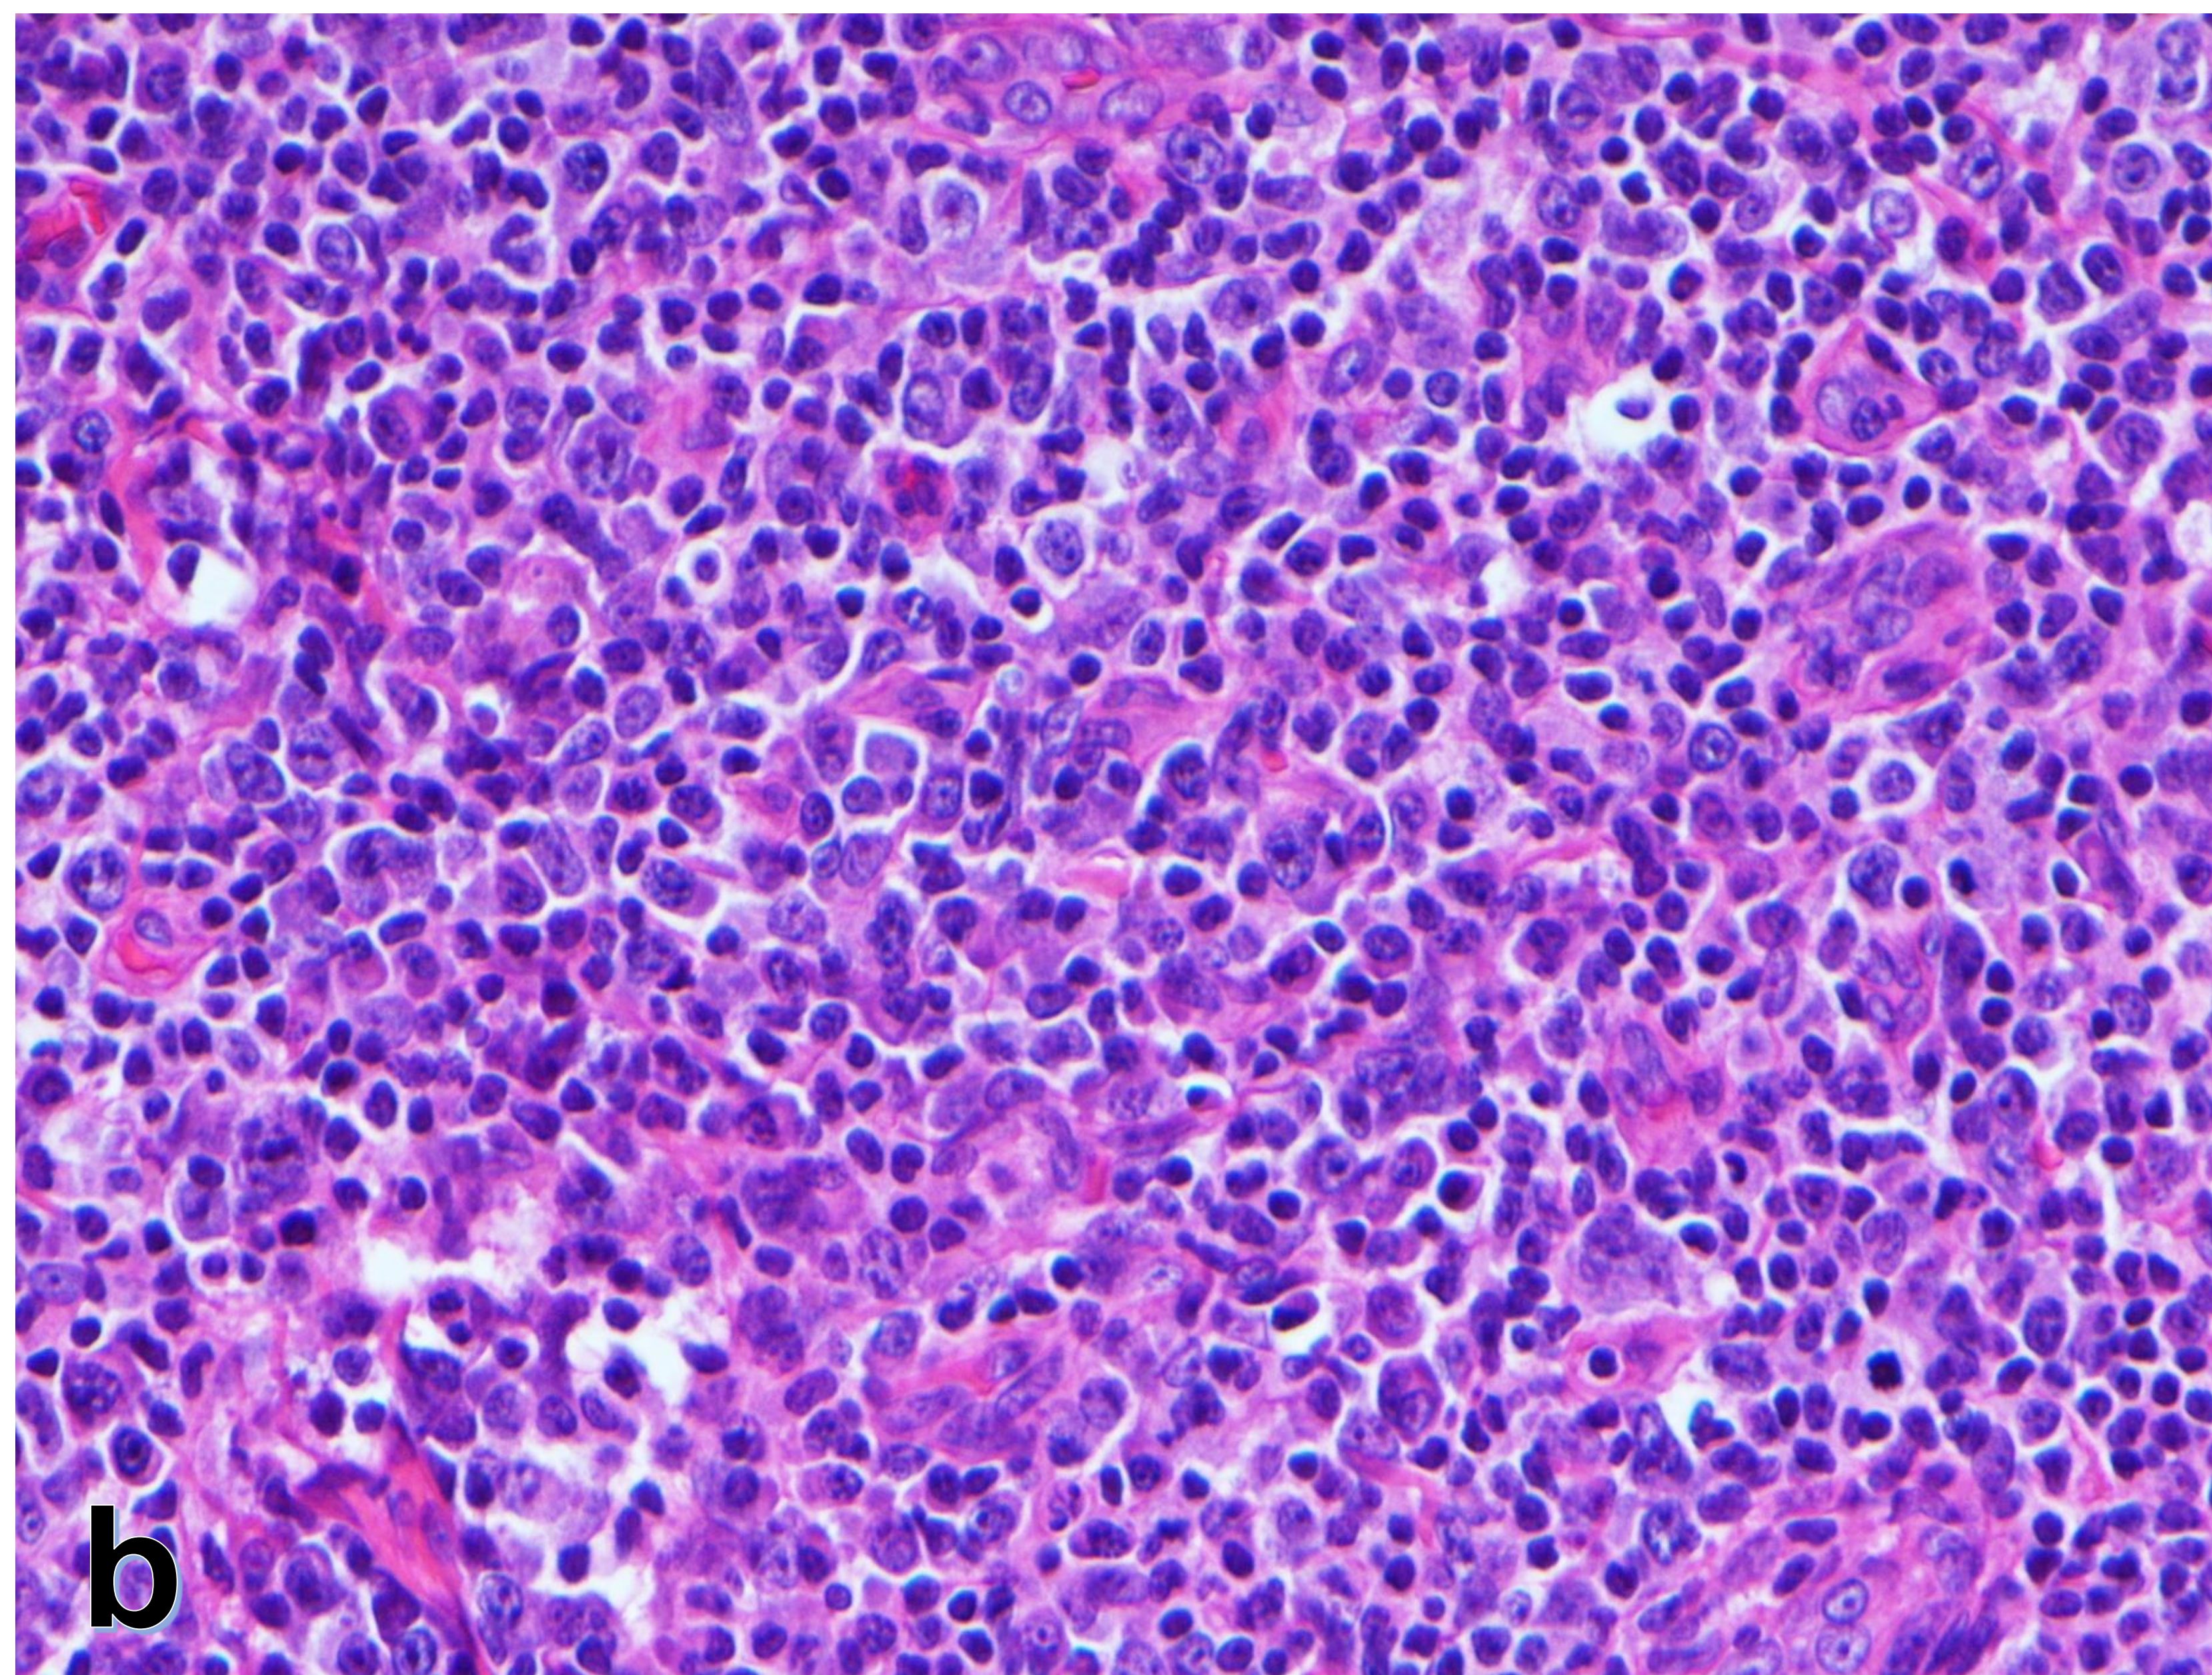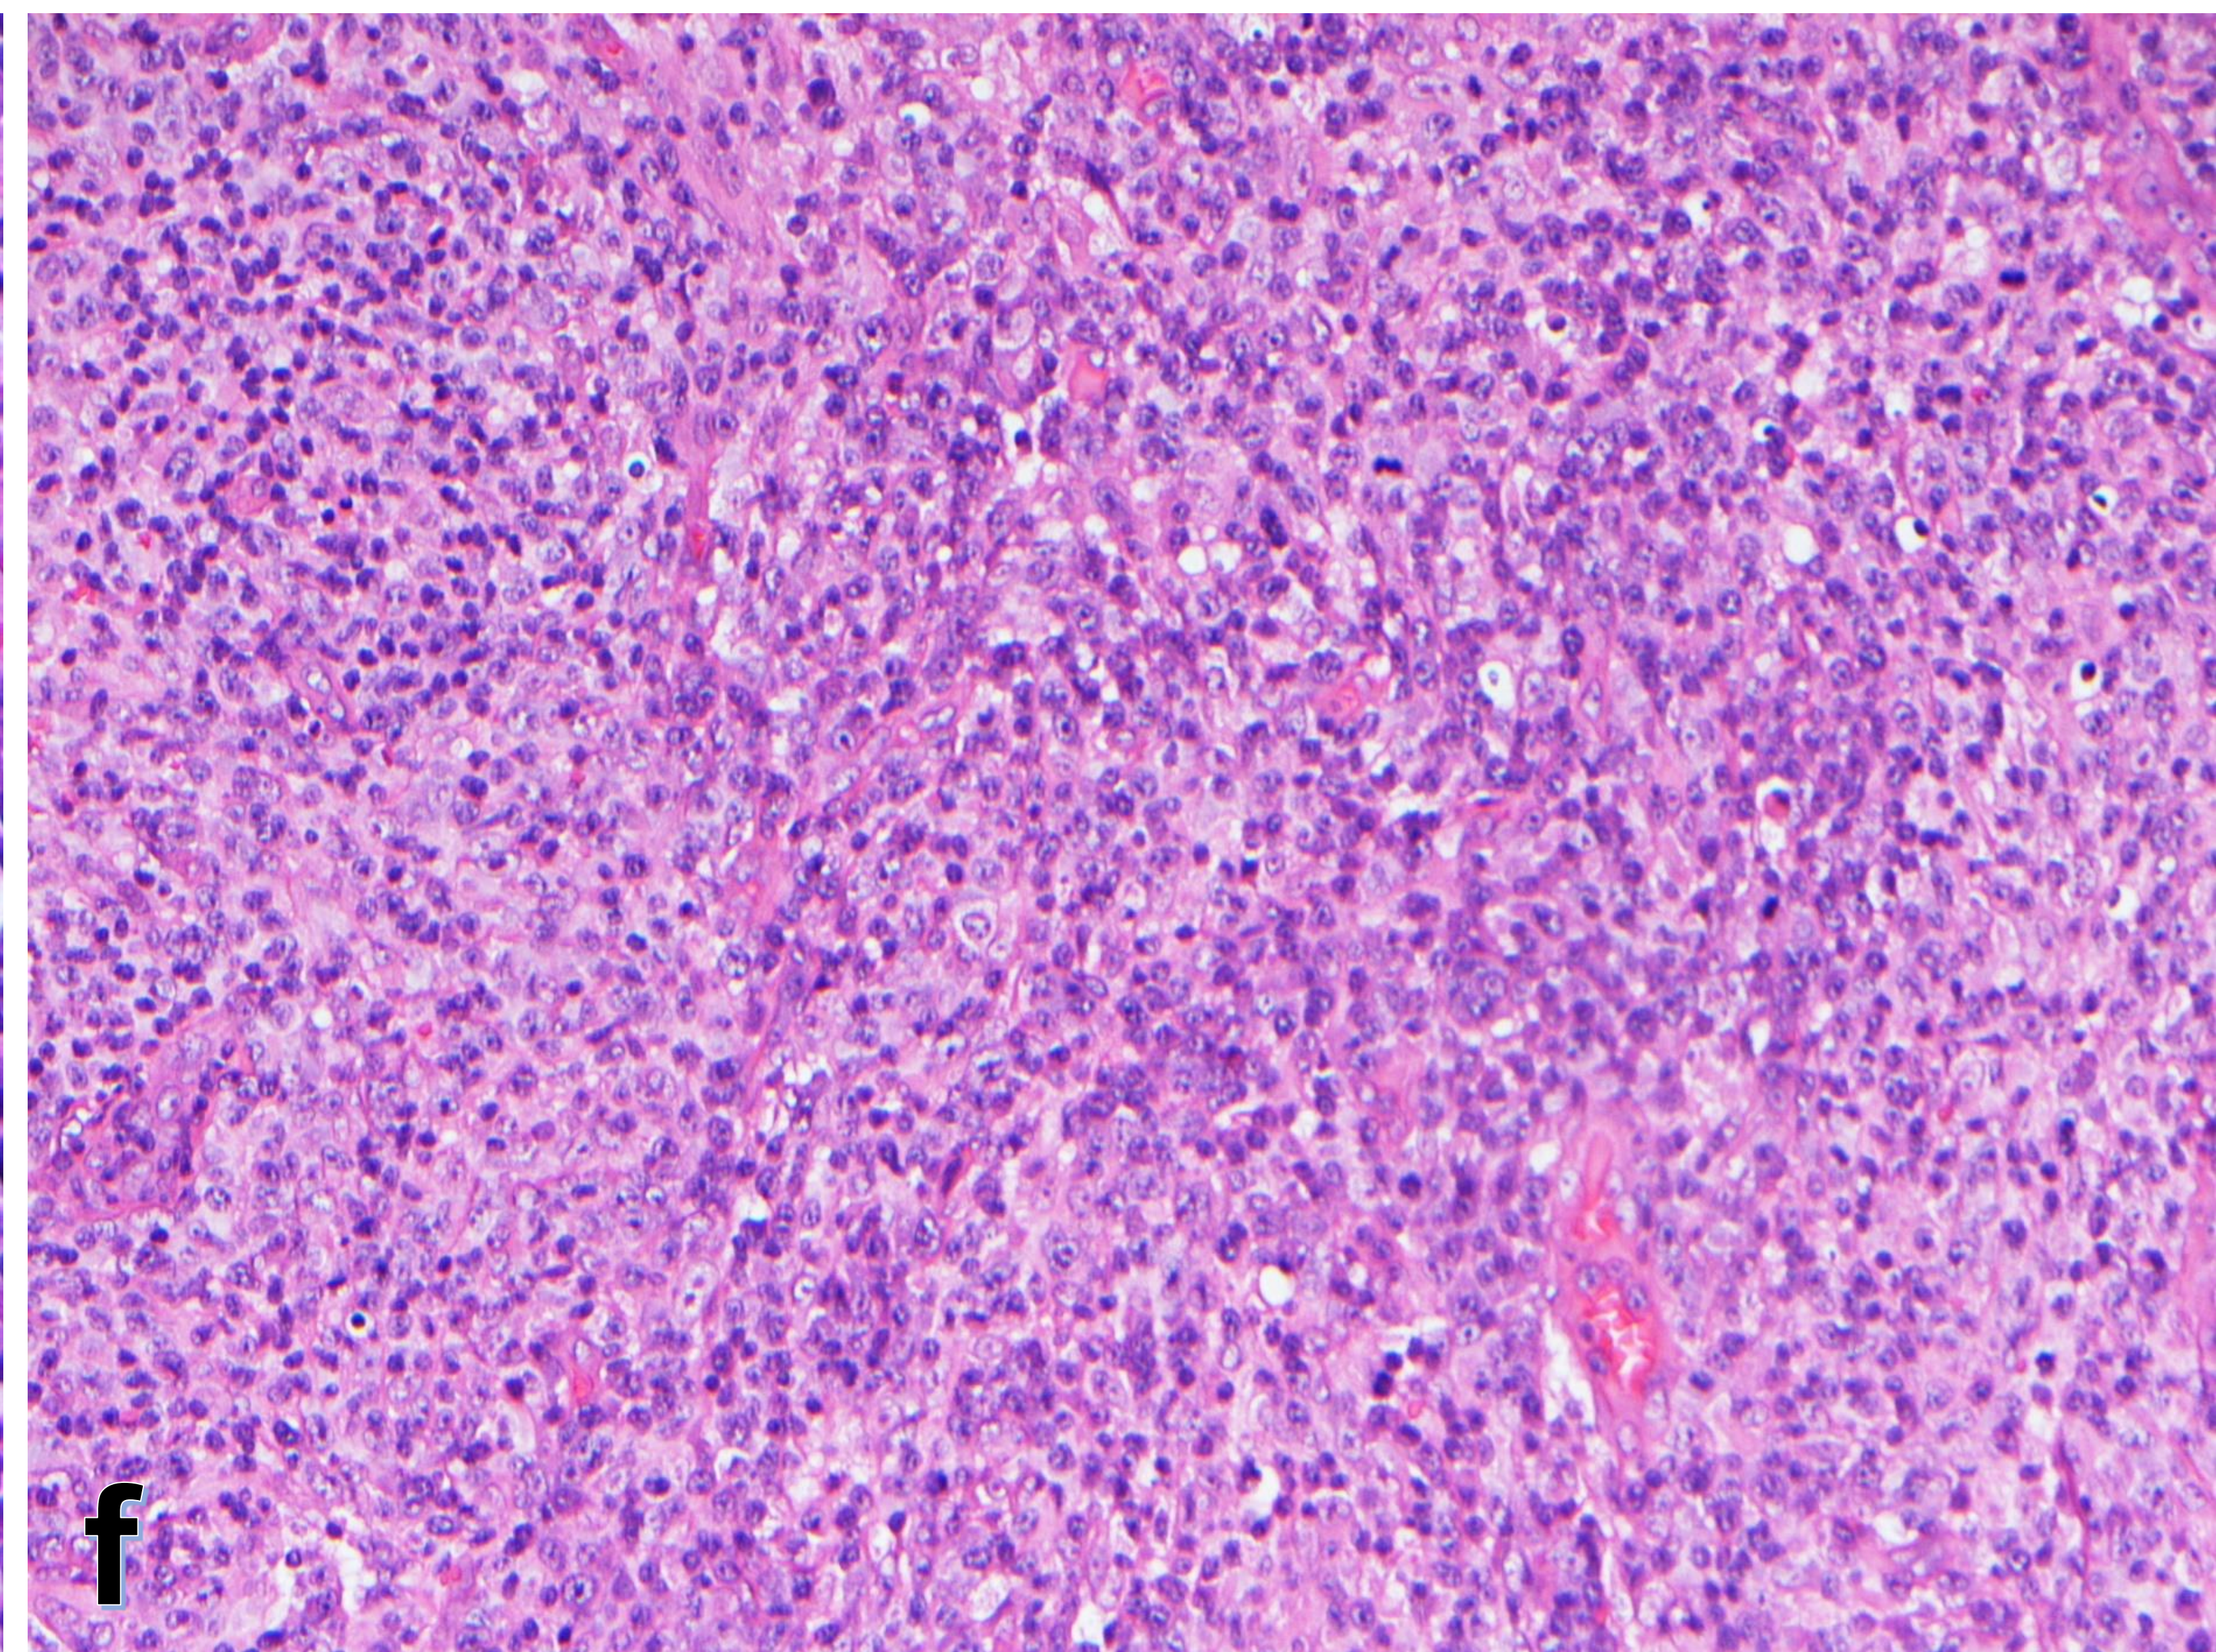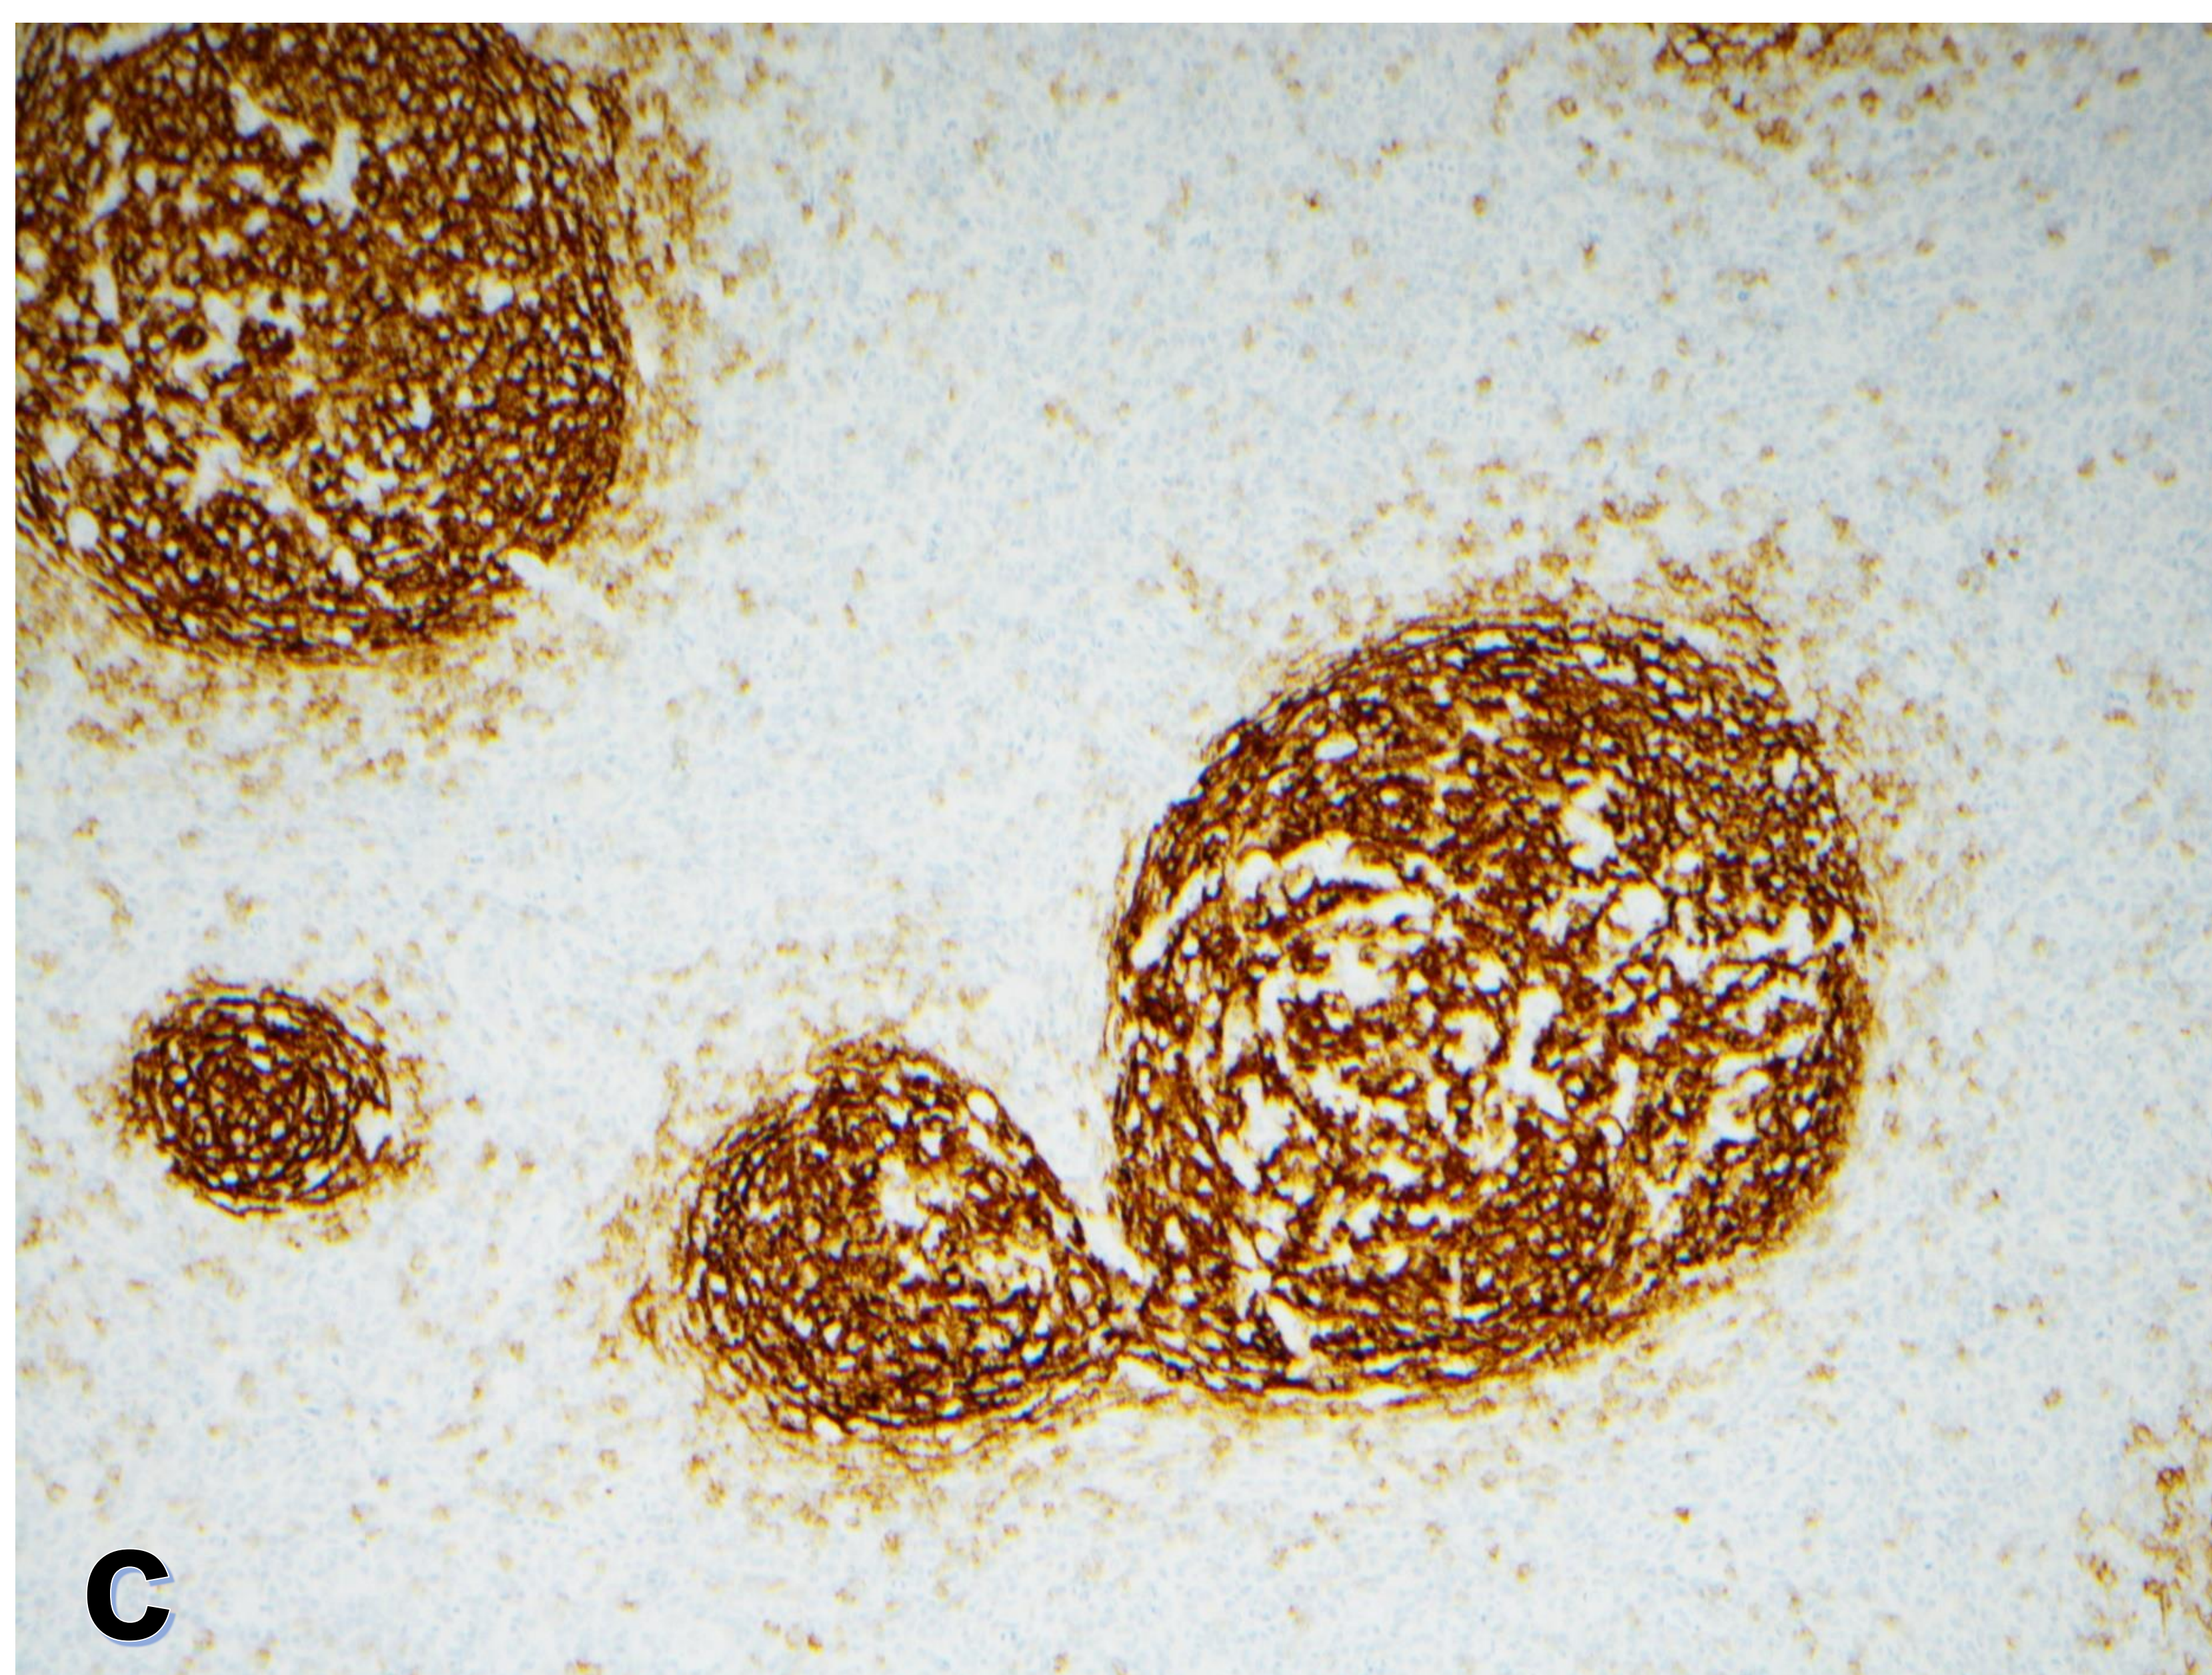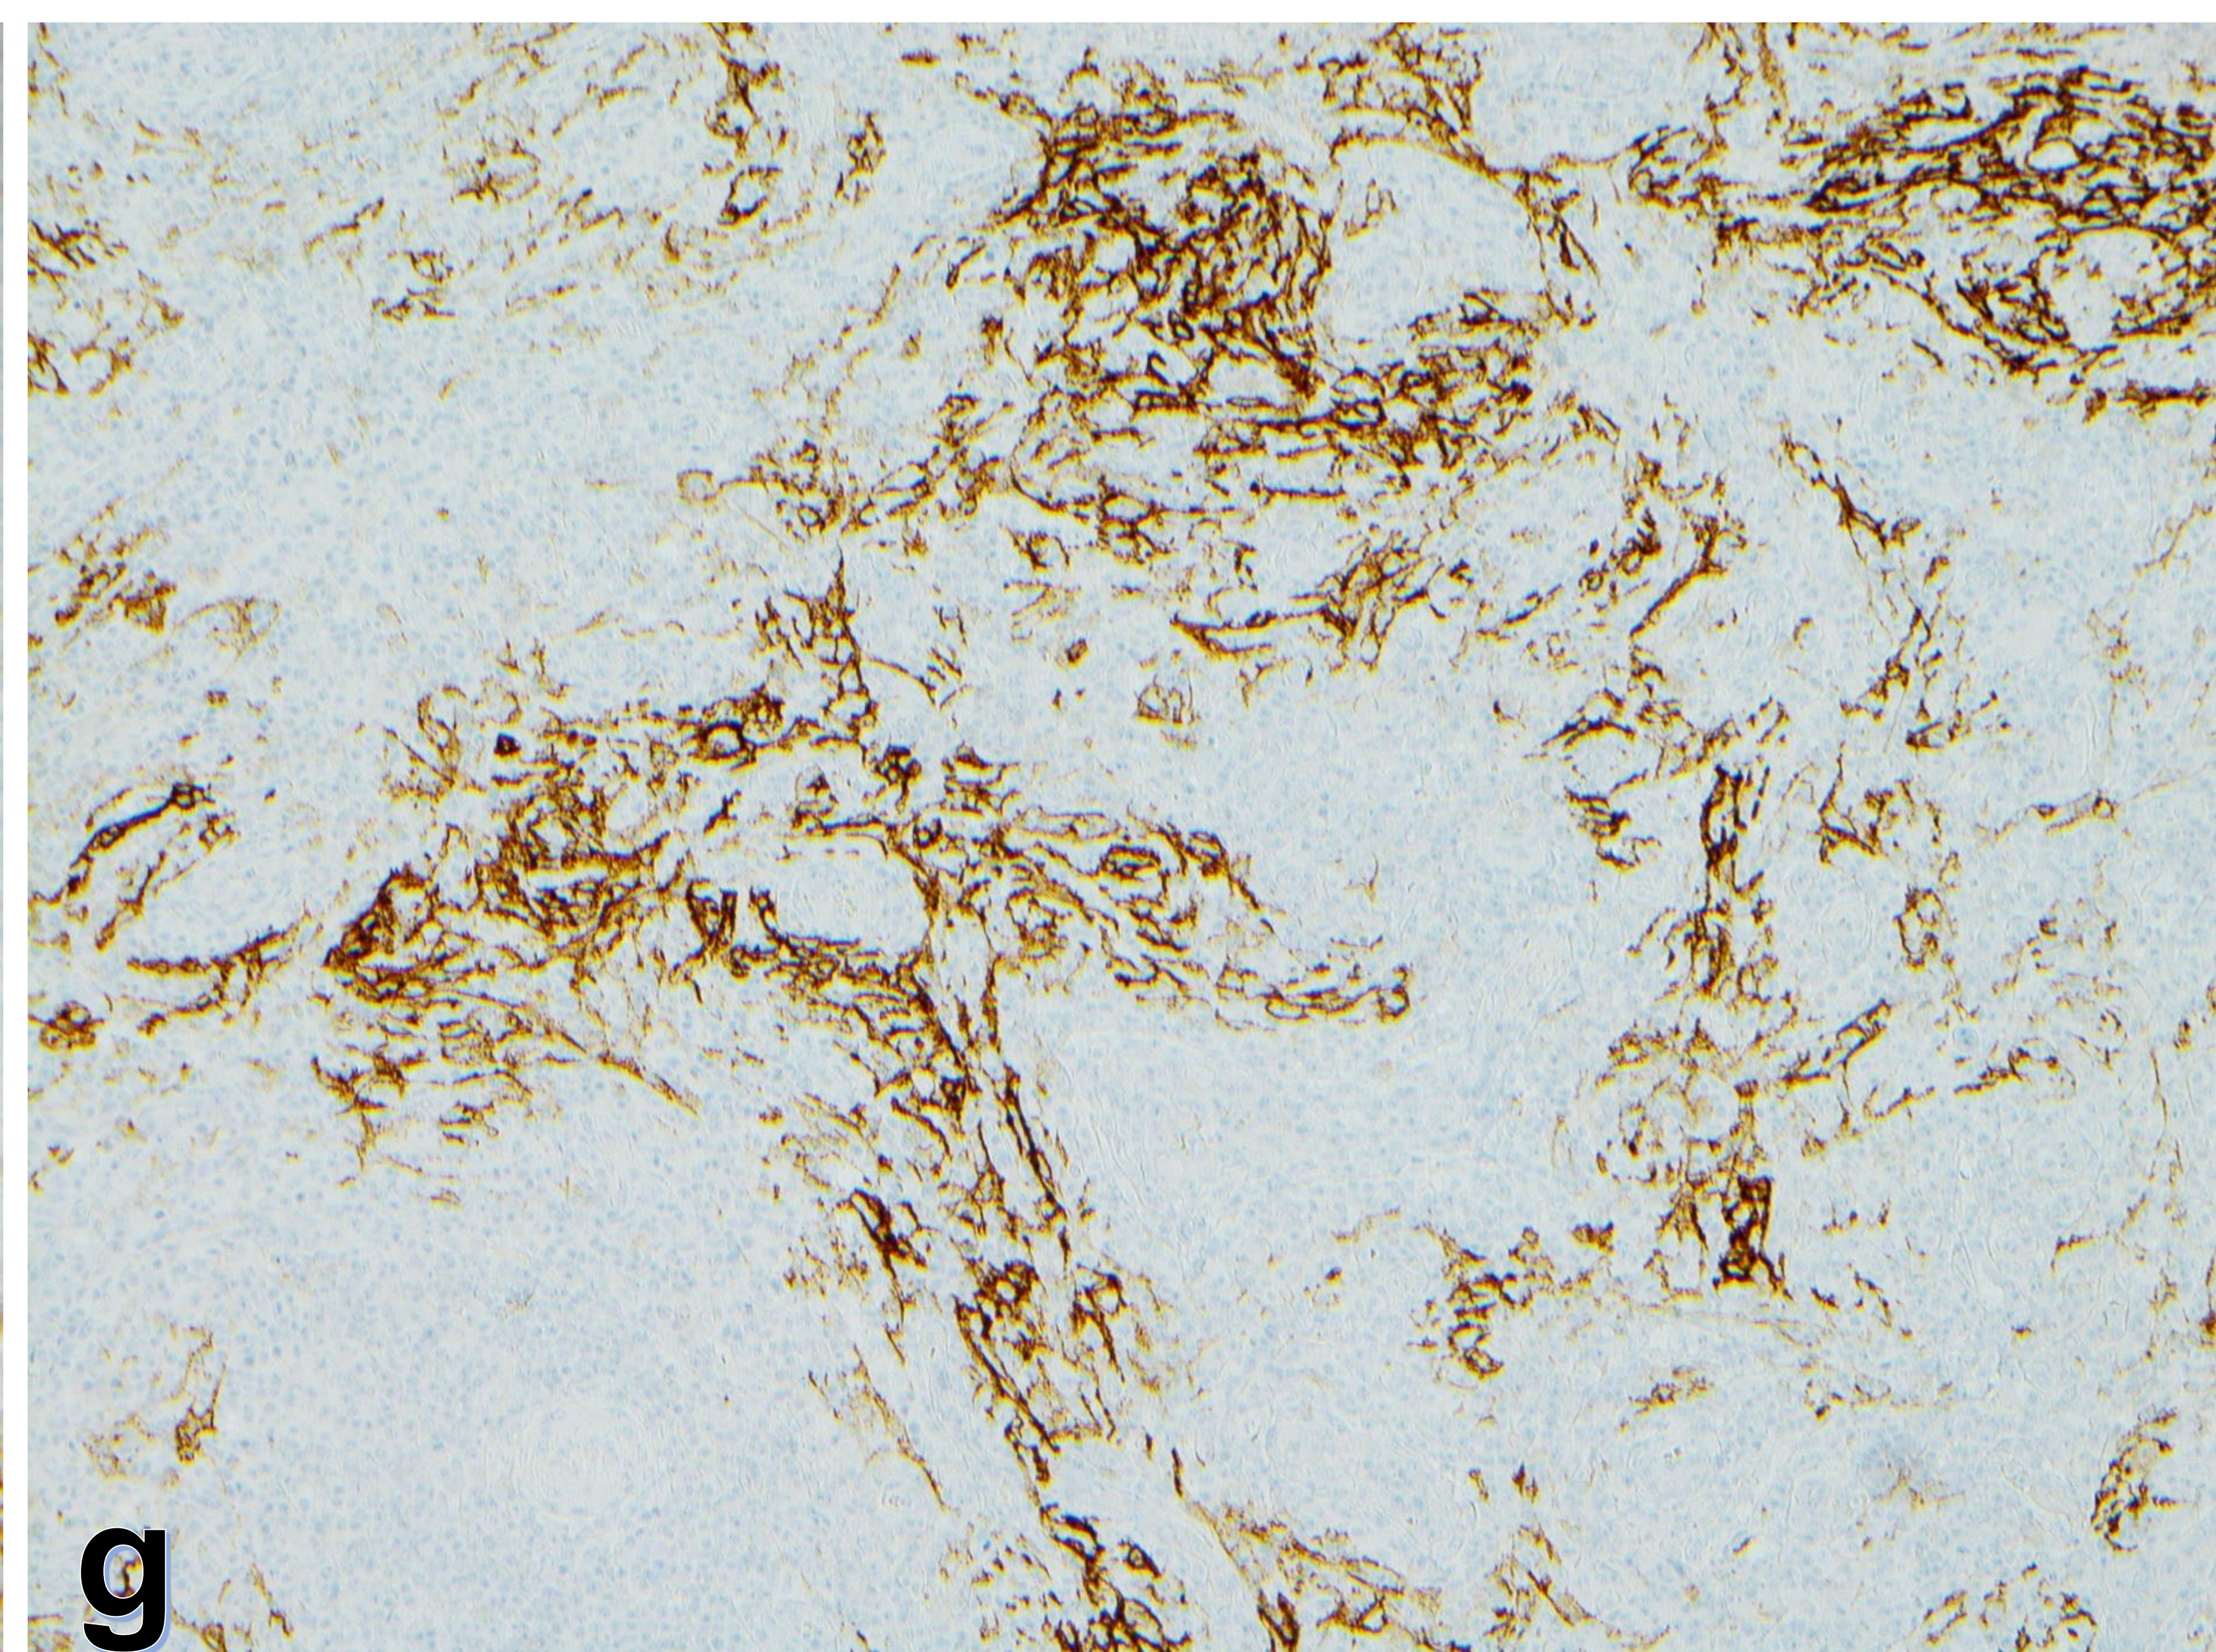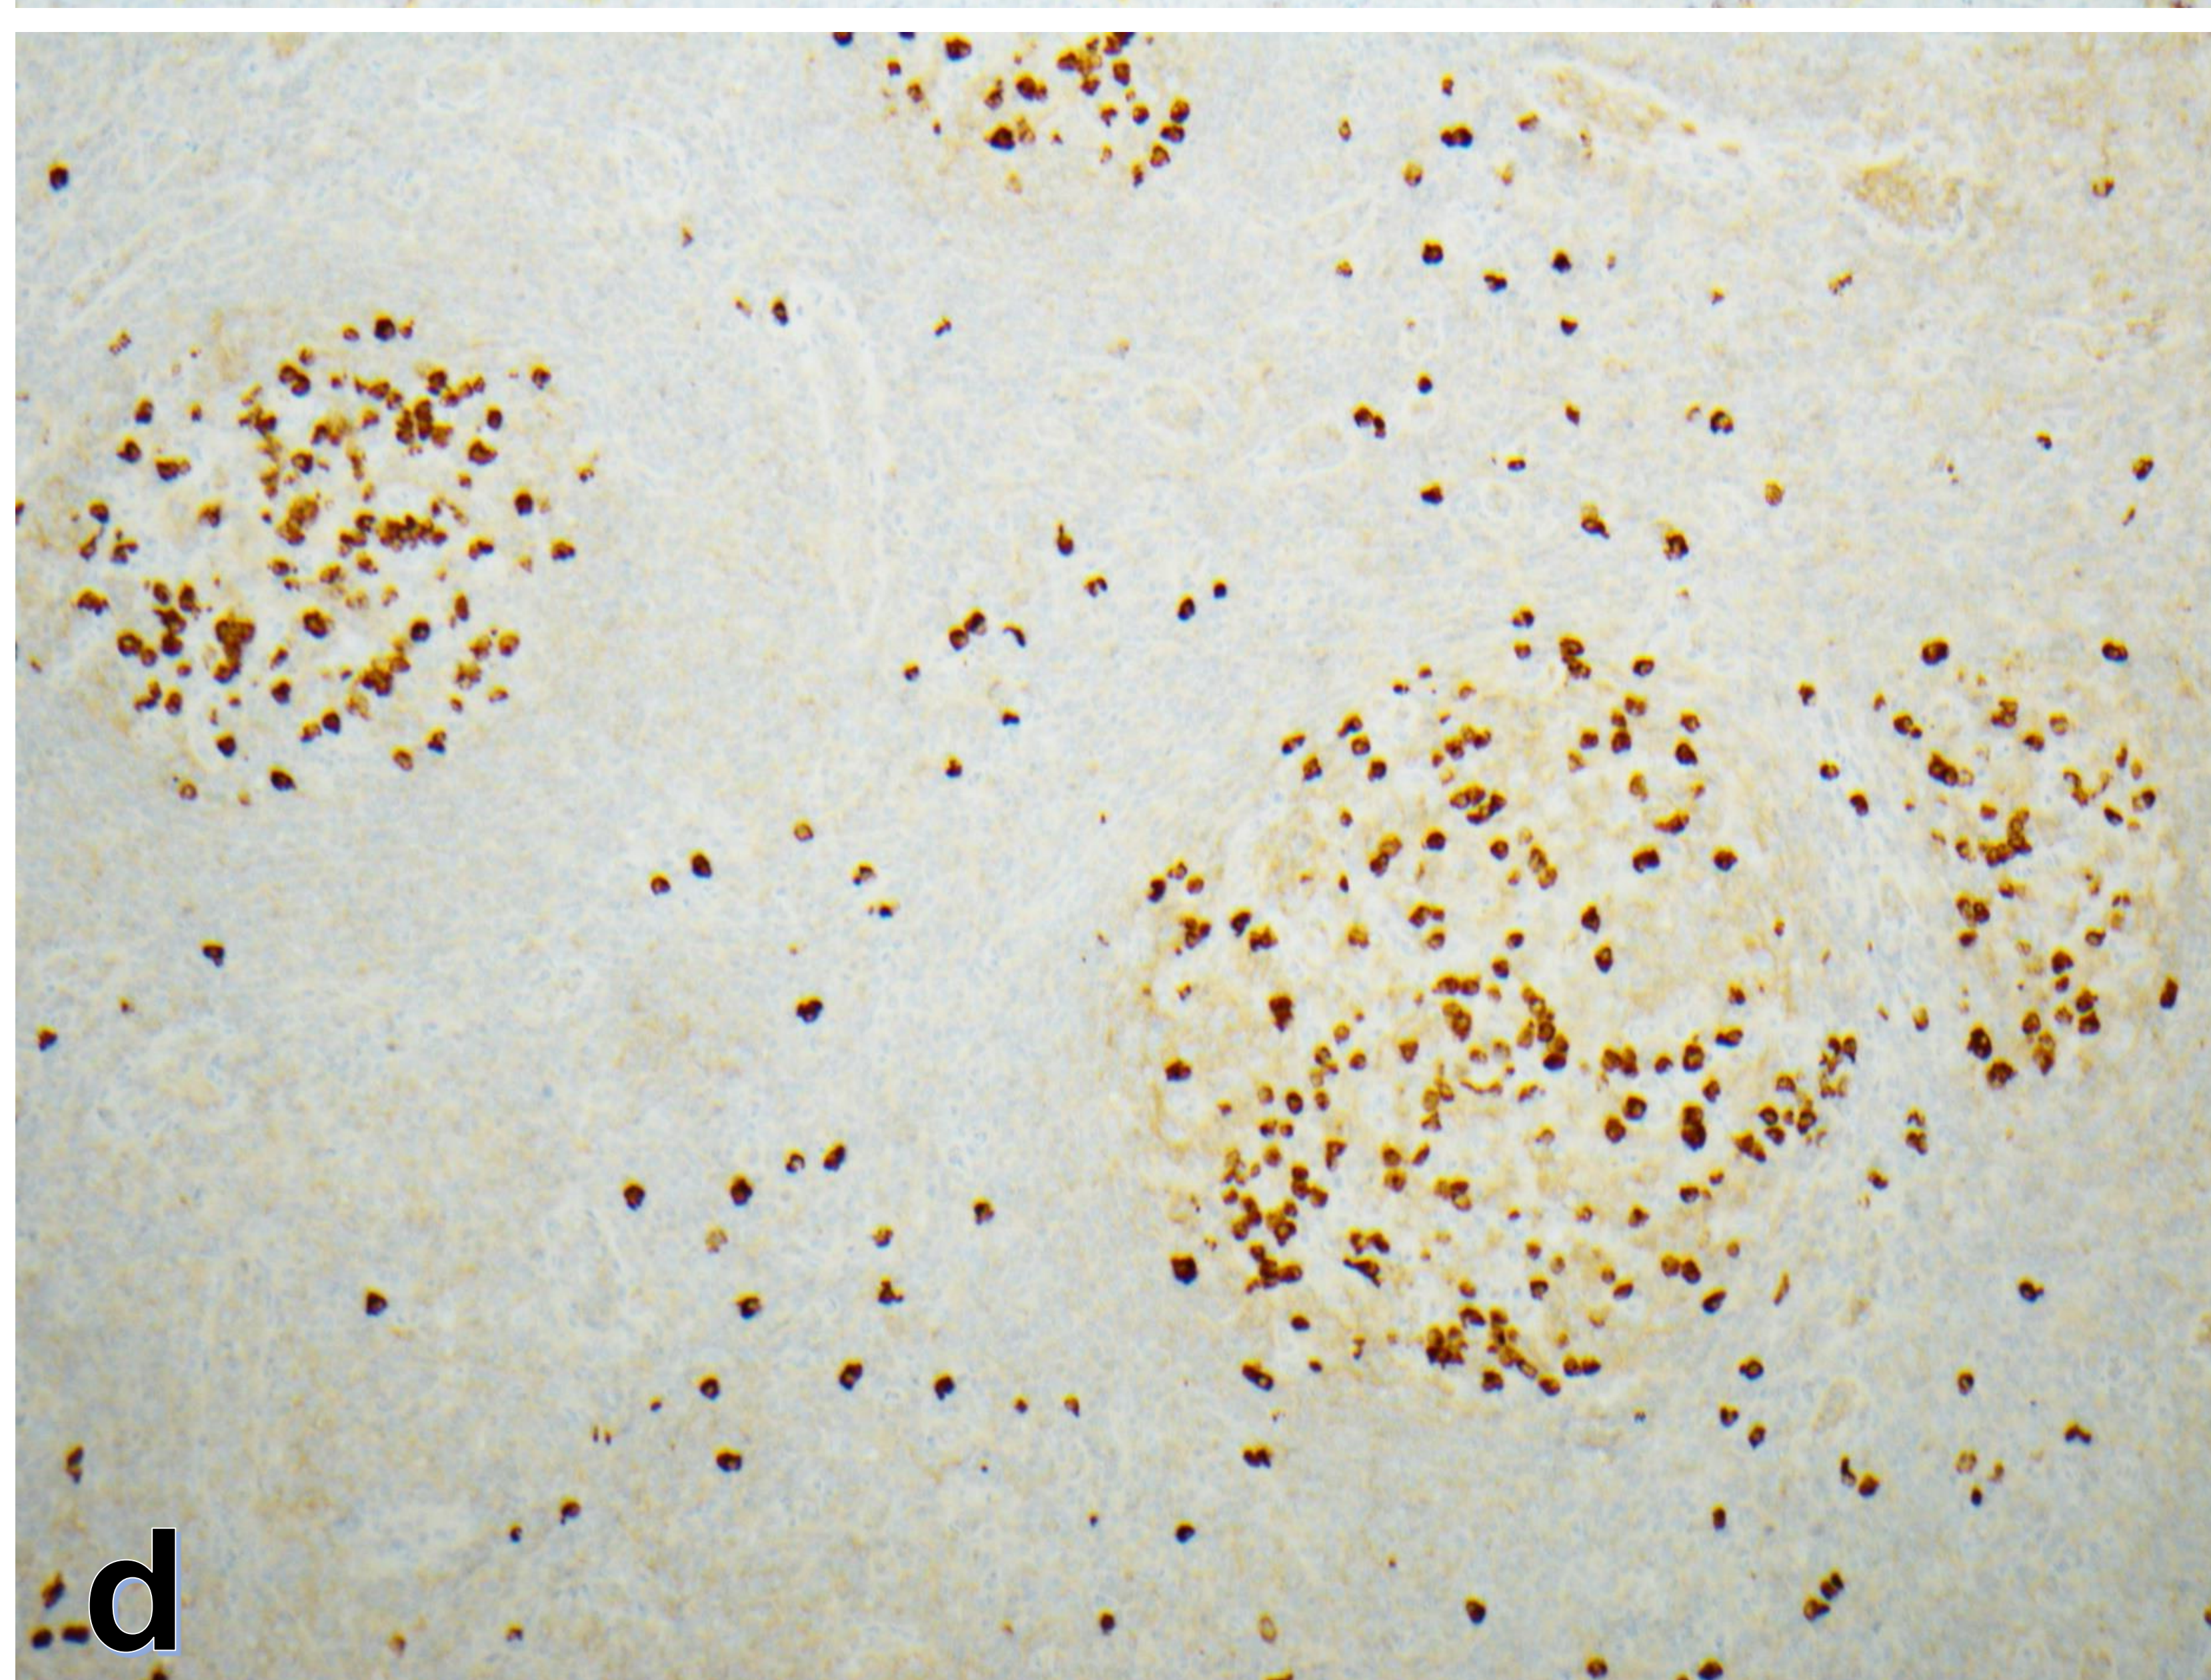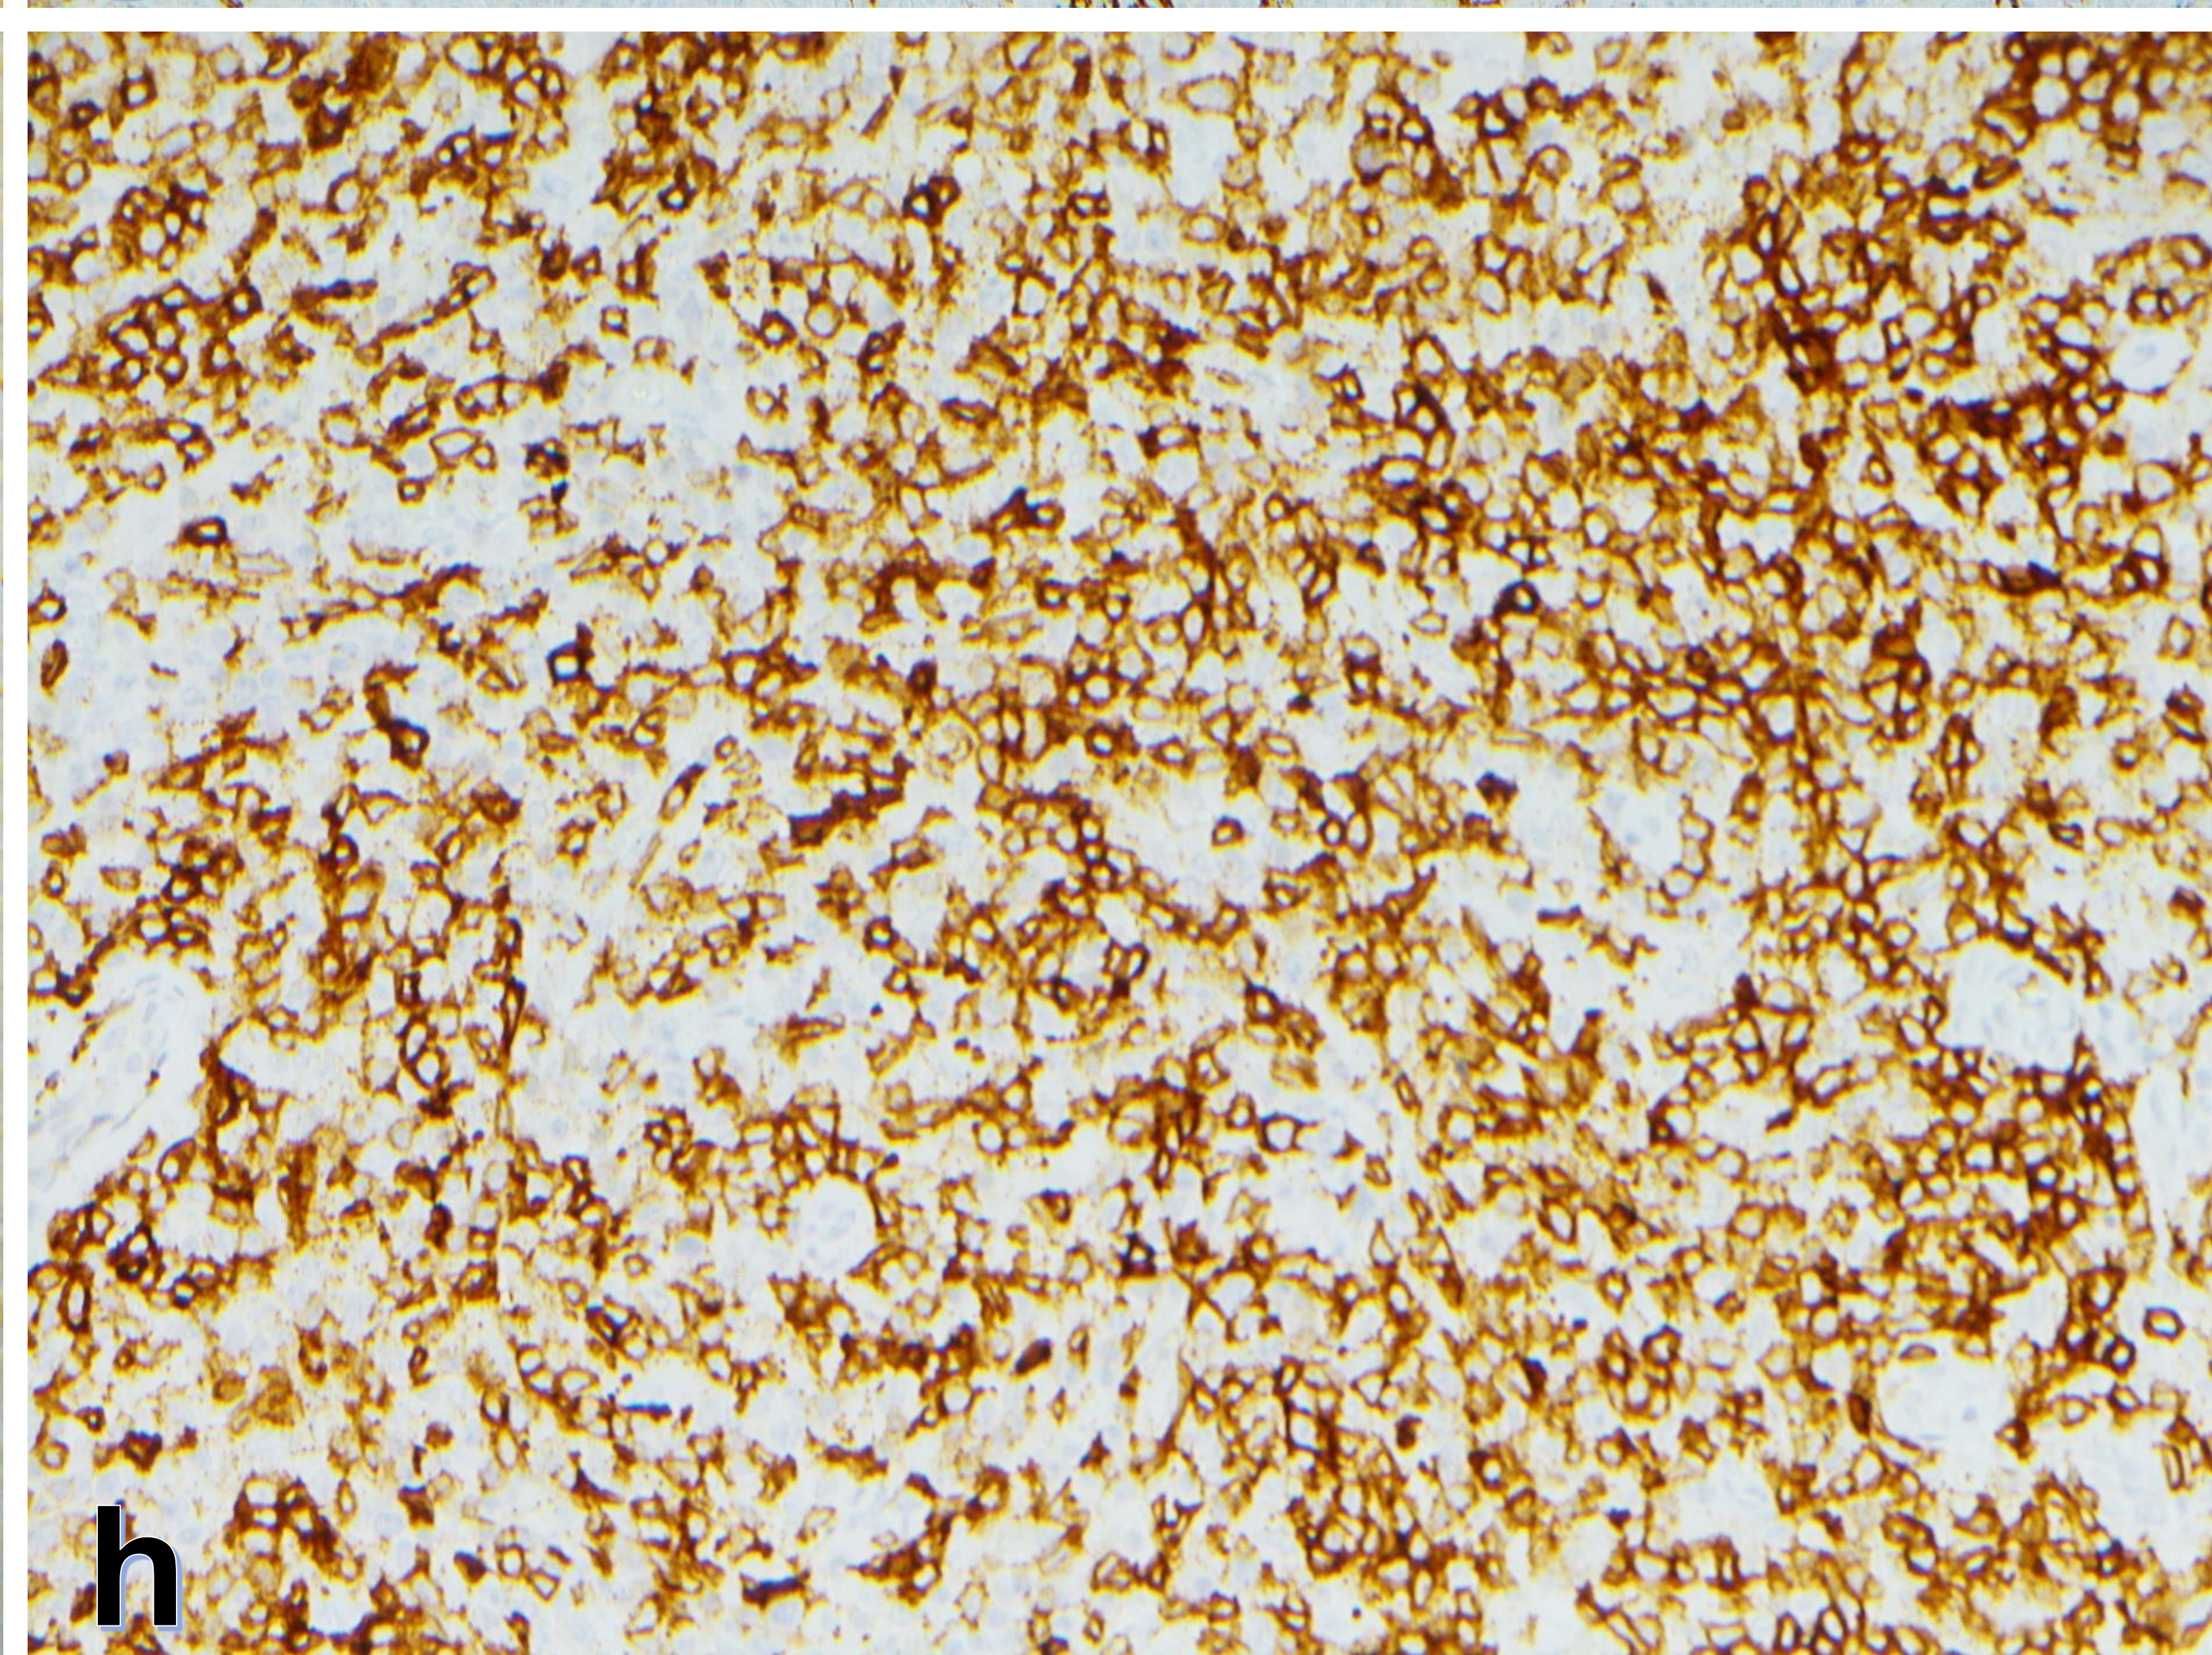



Figure S1. Pathological findings in case 3. HHV-8-negative multicentric Castleman's disease shows reactive germinal centers (GCs). (a) Some are atrophic with onion skin lesions (H&E, original magnification 200 ×). (b) Interfollicular region is expanded with small lymphocytes, immature/mature plasma cells, and proliferating blood vessels (H&E, original magnification 400 ×). (c) CD21 staining highlights tight clusters of follicular dendritic cells (FDCs) in the GC with no meshwork expansion (H&E, original magnification 100 ×). (d) The IgG4+ immature/mature plasma cells show both inter- and intrafollicular localization. (H&E, original magnification 100 ×). (e) The lymph node with AITL exhibits effaced nodal architecture (original magnification 100 ×), with (f) sheets of immature/mature plasma cells (original magnification 200 ×) and (g) expansion of FDC meshwork highlighted by CD21 staining (original magnification 100 ×). (h) The lymphoma cells are diffusely positive for PD-1 (original magnification 200 ×).
