# Supplementary material
Source: publisher figshare collection journal article supplement (https://karger.figshare.com/articles/dataset/_/21617931)
Supplement: Supplementary file 3 [file 1]

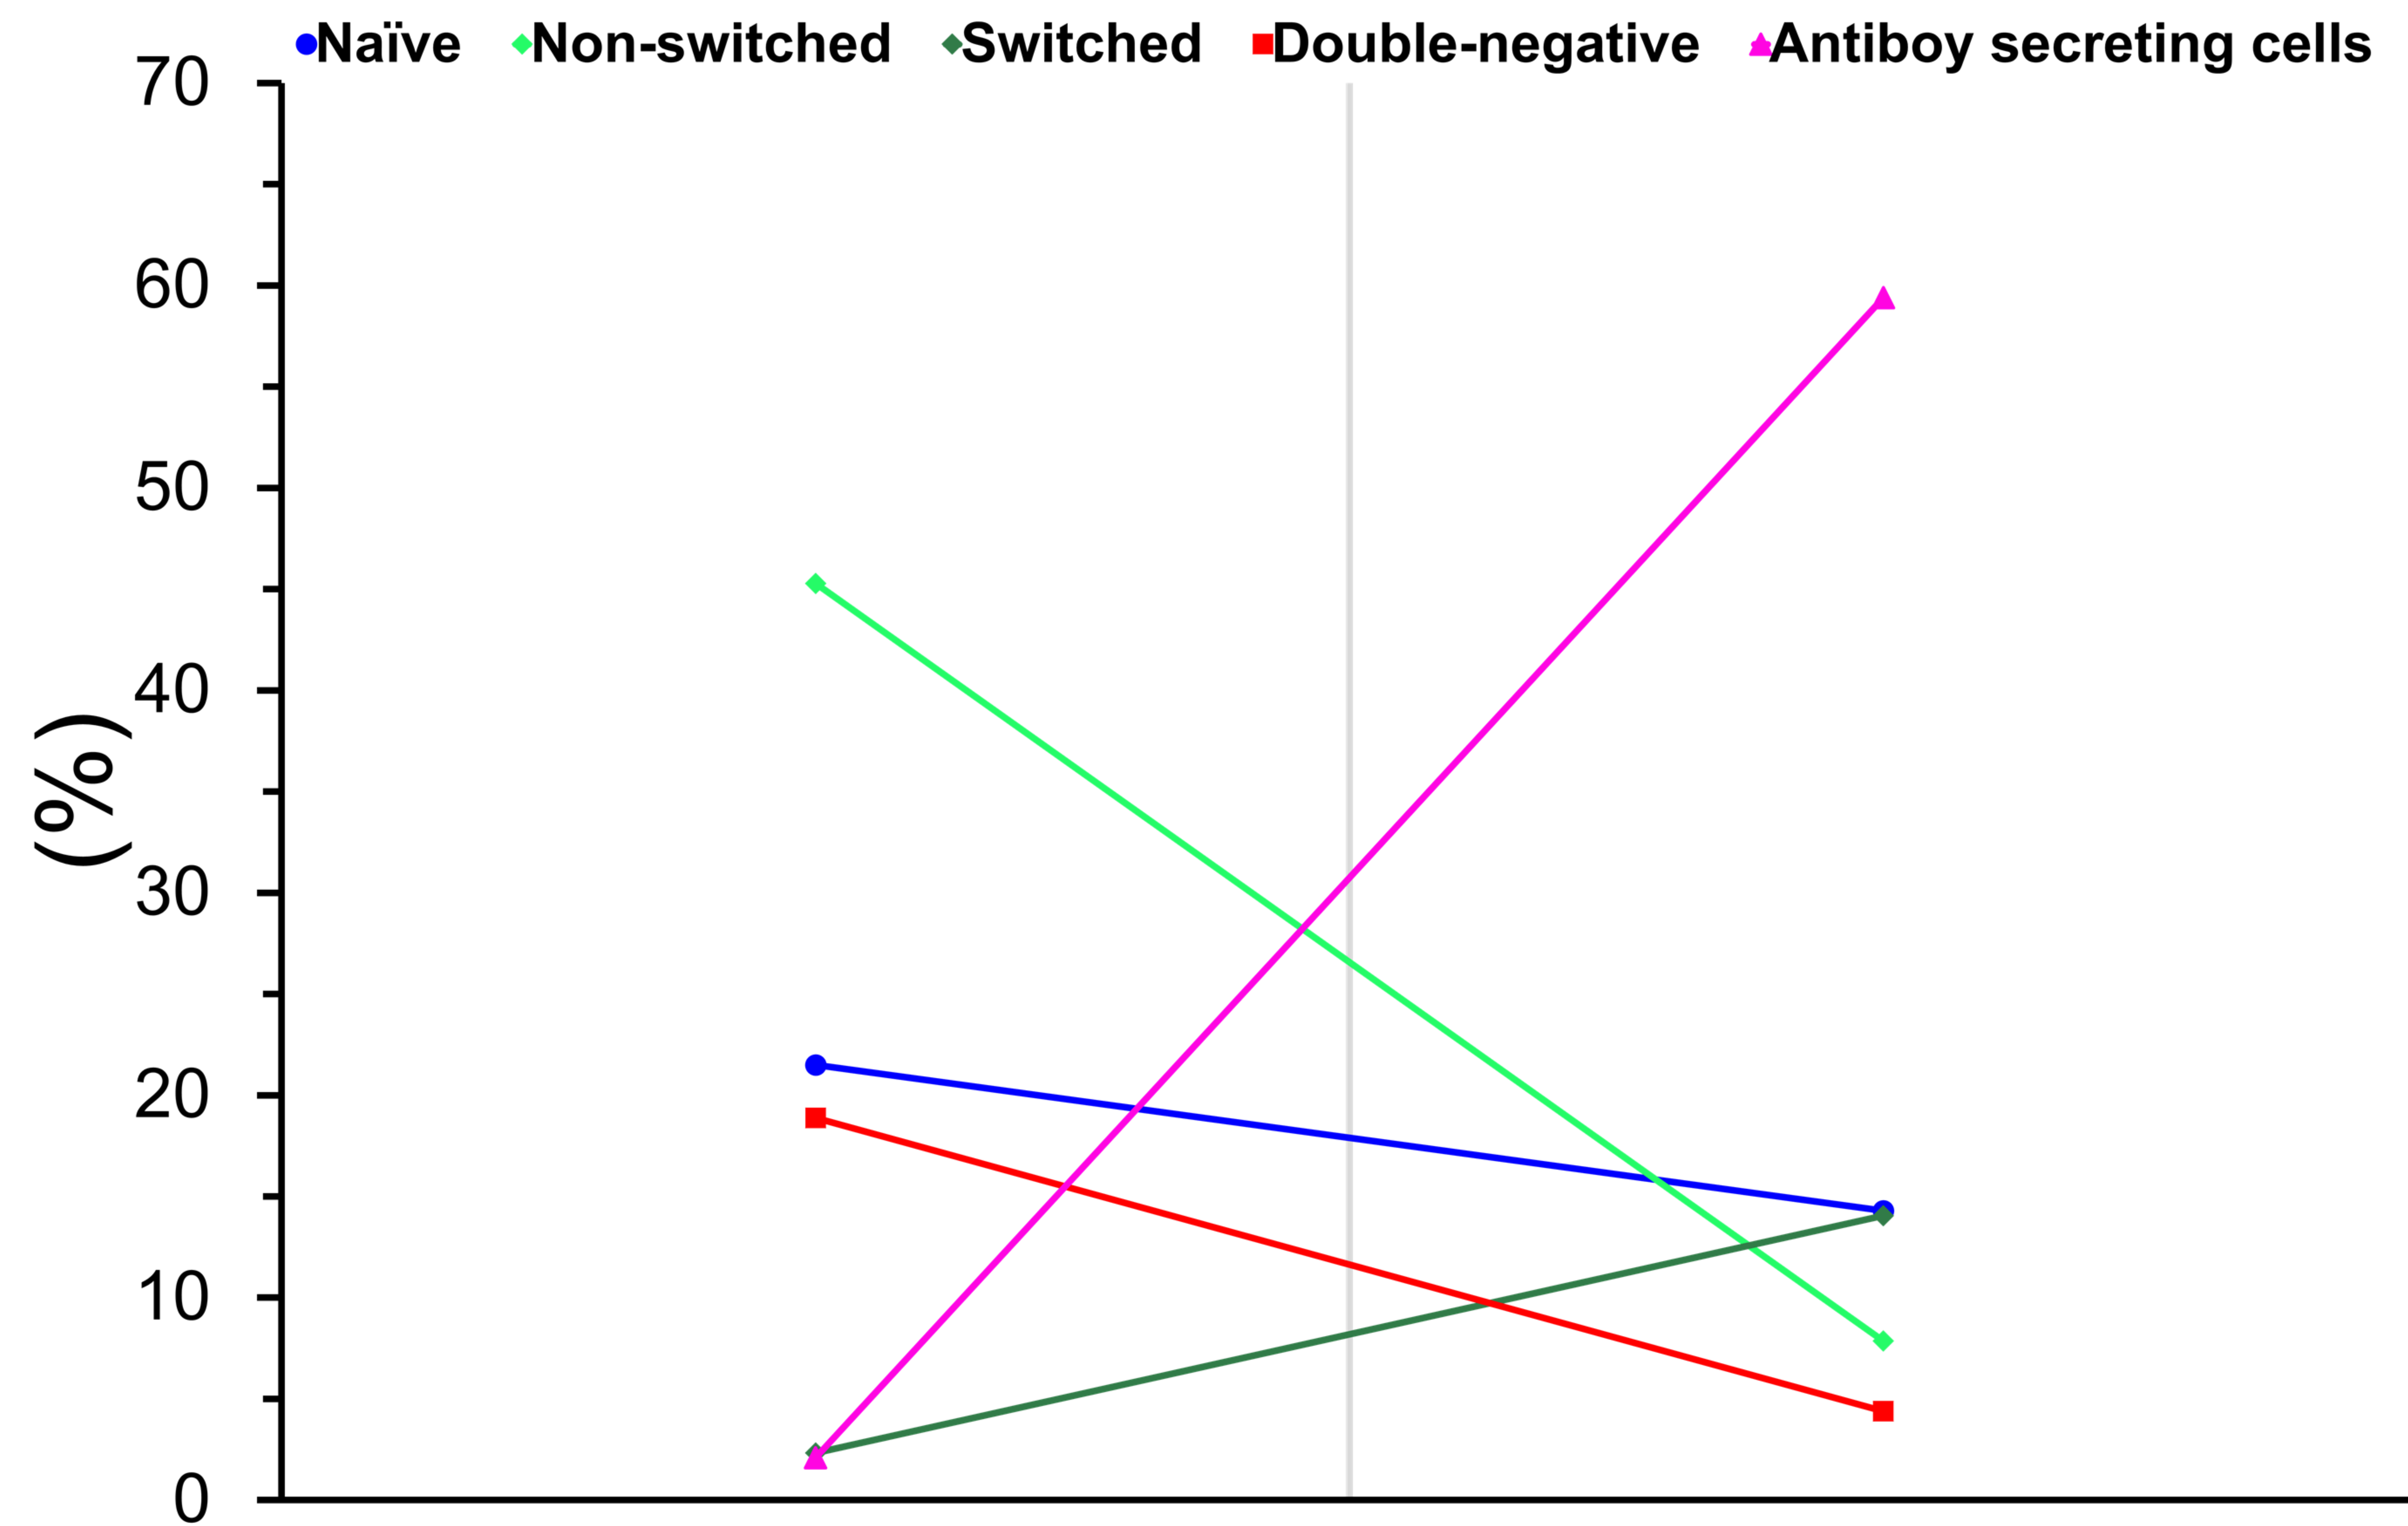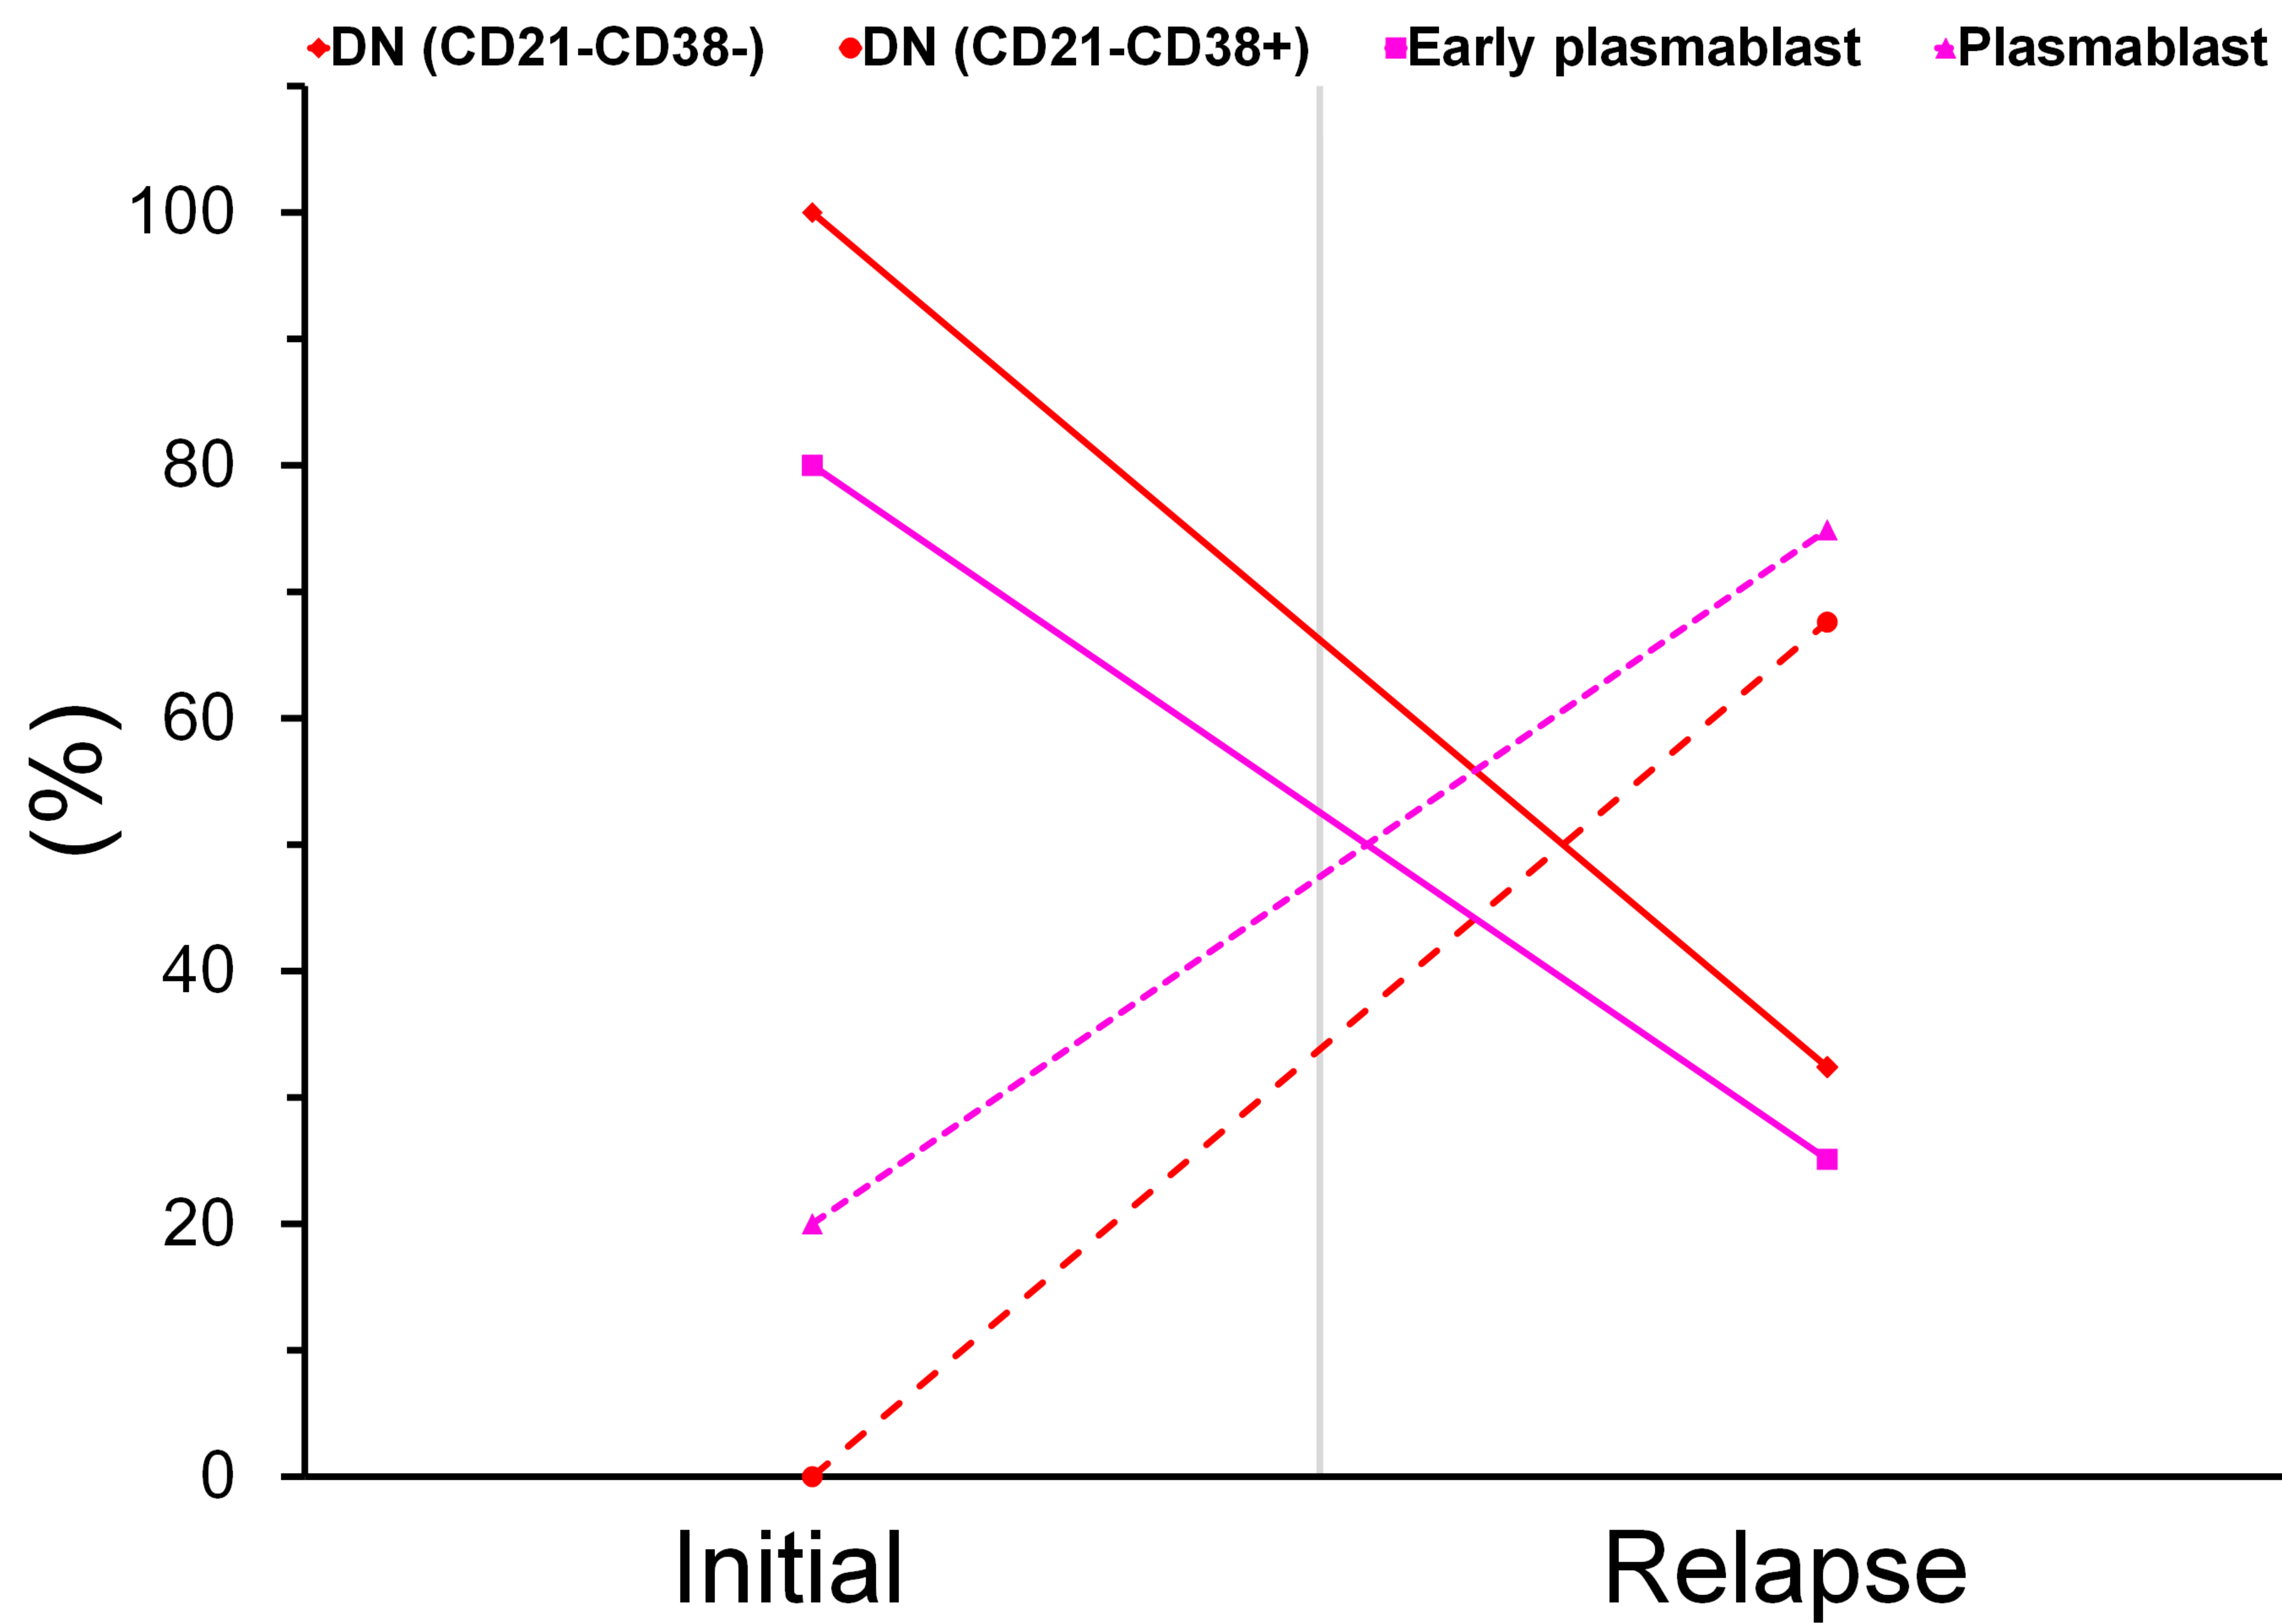

Figure S3. The immunophenotyping study reveals increased percentages of switched memory B-cells (dark green, in % B lymphocytes), antibody-secreting cells (fuchsia, in % B lymphocytes), CD38+ double-negative (DN) B-cells (red dash line, in % DN B lymphocytes), and plasmablasts (fuchsia dash line, in % antibody-secreting cells) in the relapsed episode.
